# Supplementary material for: Diversity oriented multi-component reaction (DOS–MCR) approach to access natural product analogues: regio- and chemo-selective synthesis of polyheterocyclic scaffolds via one-pot cascade reactions
Source: Royal Society of Chemistry journal article supplement (doi:10.1039/d0ob00368a), 2020-01-01
Supplement: d0ob00368a1.pdf [file d0ob00368a1.pdf]

## Supplementary data

### **Diversity Oriented Multi-Component (DOS-MCR) approach to access Natural Product Analogues: Regio- and Chemo- Selective Synthesis of Polyheterocyclic Scaffolds via one pot Cascade Reaction**

Lakshmanan Pazhanivel <sup>a</sup> and Vasuki Gnanasambandam <sup>a\*</sup>

Department of Chemistry, Pondicherry University, RV Nagar, Kalapet Pondicherry-605014,  
India.

Corresponding author E-mail: vasukig@gmail.com

#### **General procedure for the synthesis aza-cyclopenta (*cd*) diindene S<sub>1</sub>**

#### **Synthesis of 5-amino-2-imino-10c-phenyl-2,10c-dihydro-1-oxa-4,6,10b-triazacyclopenta[1,2-a:5,4,3-c'd']diinden-3(4H)-one S<sub>1</sub>:**

Initially, a three component reaction was performed between 4-methyl phenylglyoxal (1mmol) (**A<sub>1</sub>**), benzimidazole acetonitrile (1mmol) (**C<sub>1</sub>**) and malononitrile (1mmol) (**C<sub>5</sub>**) in the presence of Triflic acid medium at room temperature in an open atmosphere. The progress of the reaction was monitored by TLC for completion of the reaction. The reaction mixture turned to a pale yellow precipitate to afford the required product in 1 h. Subsequently, the crude product was washed in CH<sub>3</sub>CN solvent several times and a white solid was obtained (Yield of 87%). Then, the product was confirmed by <sup>1</sup>H NMR, <sup>13</sup>C NMR and HRMS spectra.

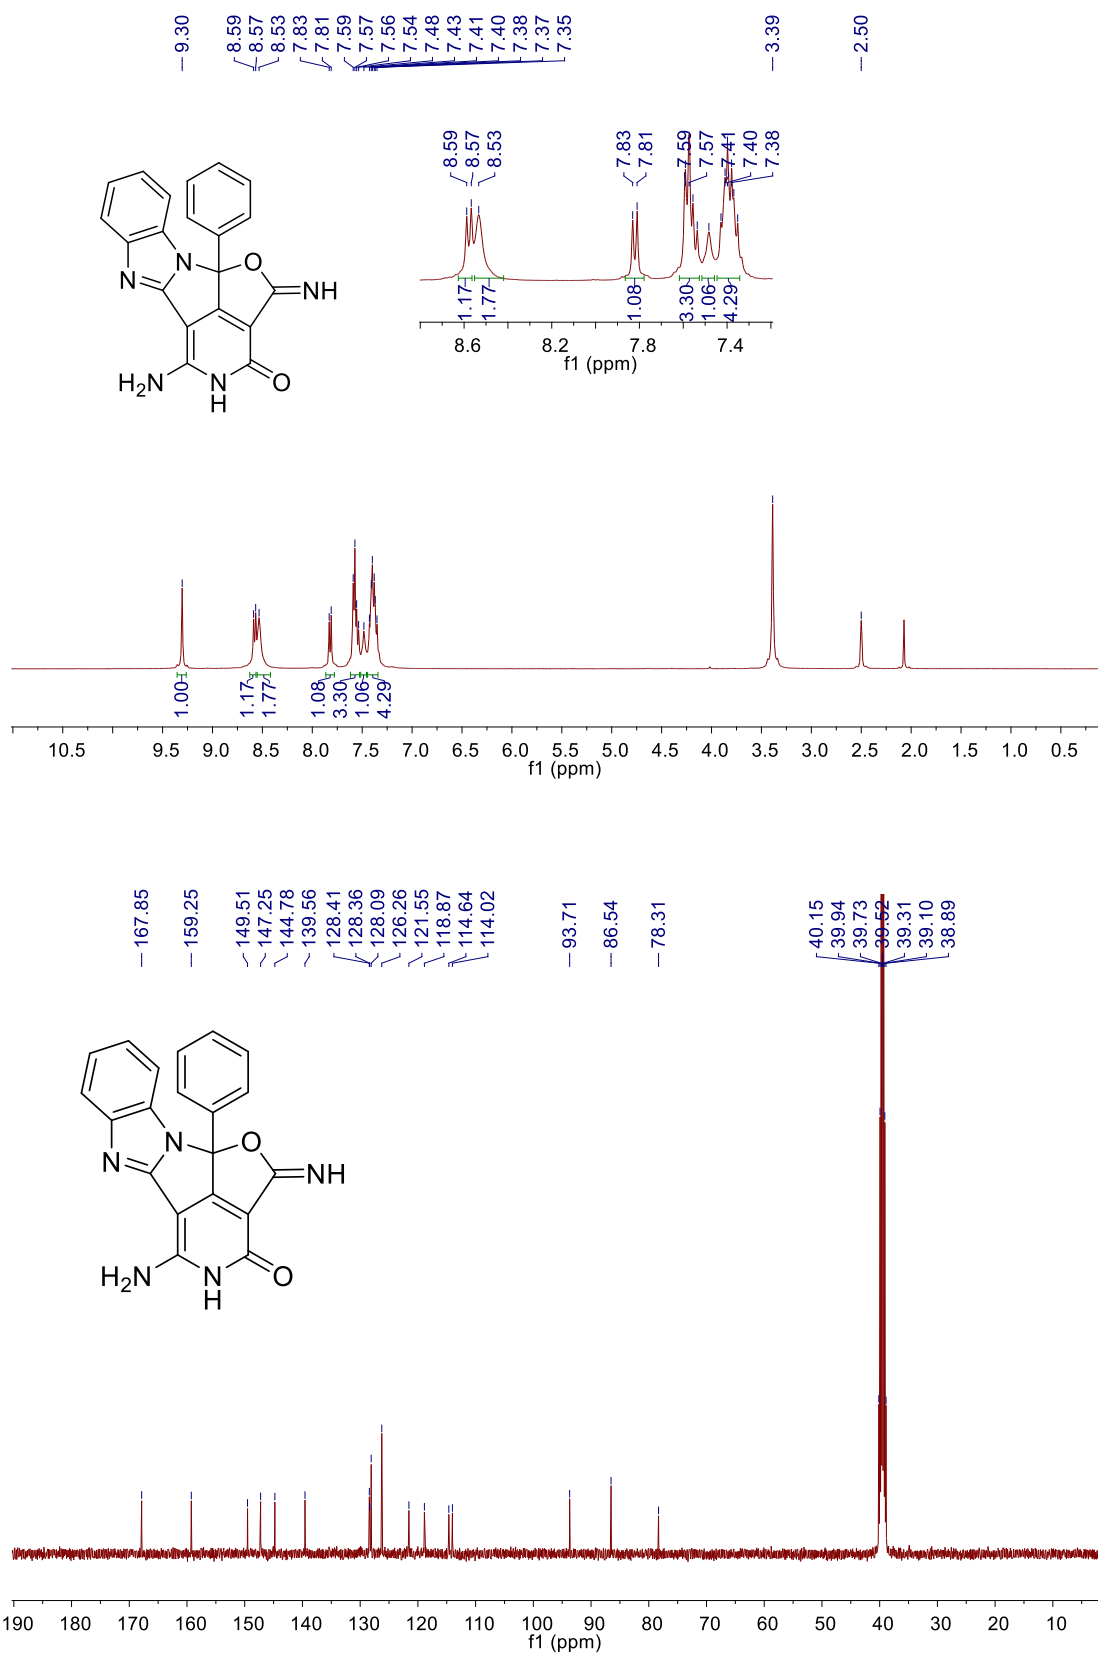

**Fig. 1** <sup>1</sup>H, <sup>13</sup>C spectrum of 5-amino-2-imino-10c-phenyl-2,10c-dihydro-1-oxa-4,6,10b-triazacyclopenta[1,2-a:5,4,3-c'd']diinden-3(4H)-one **S1a**

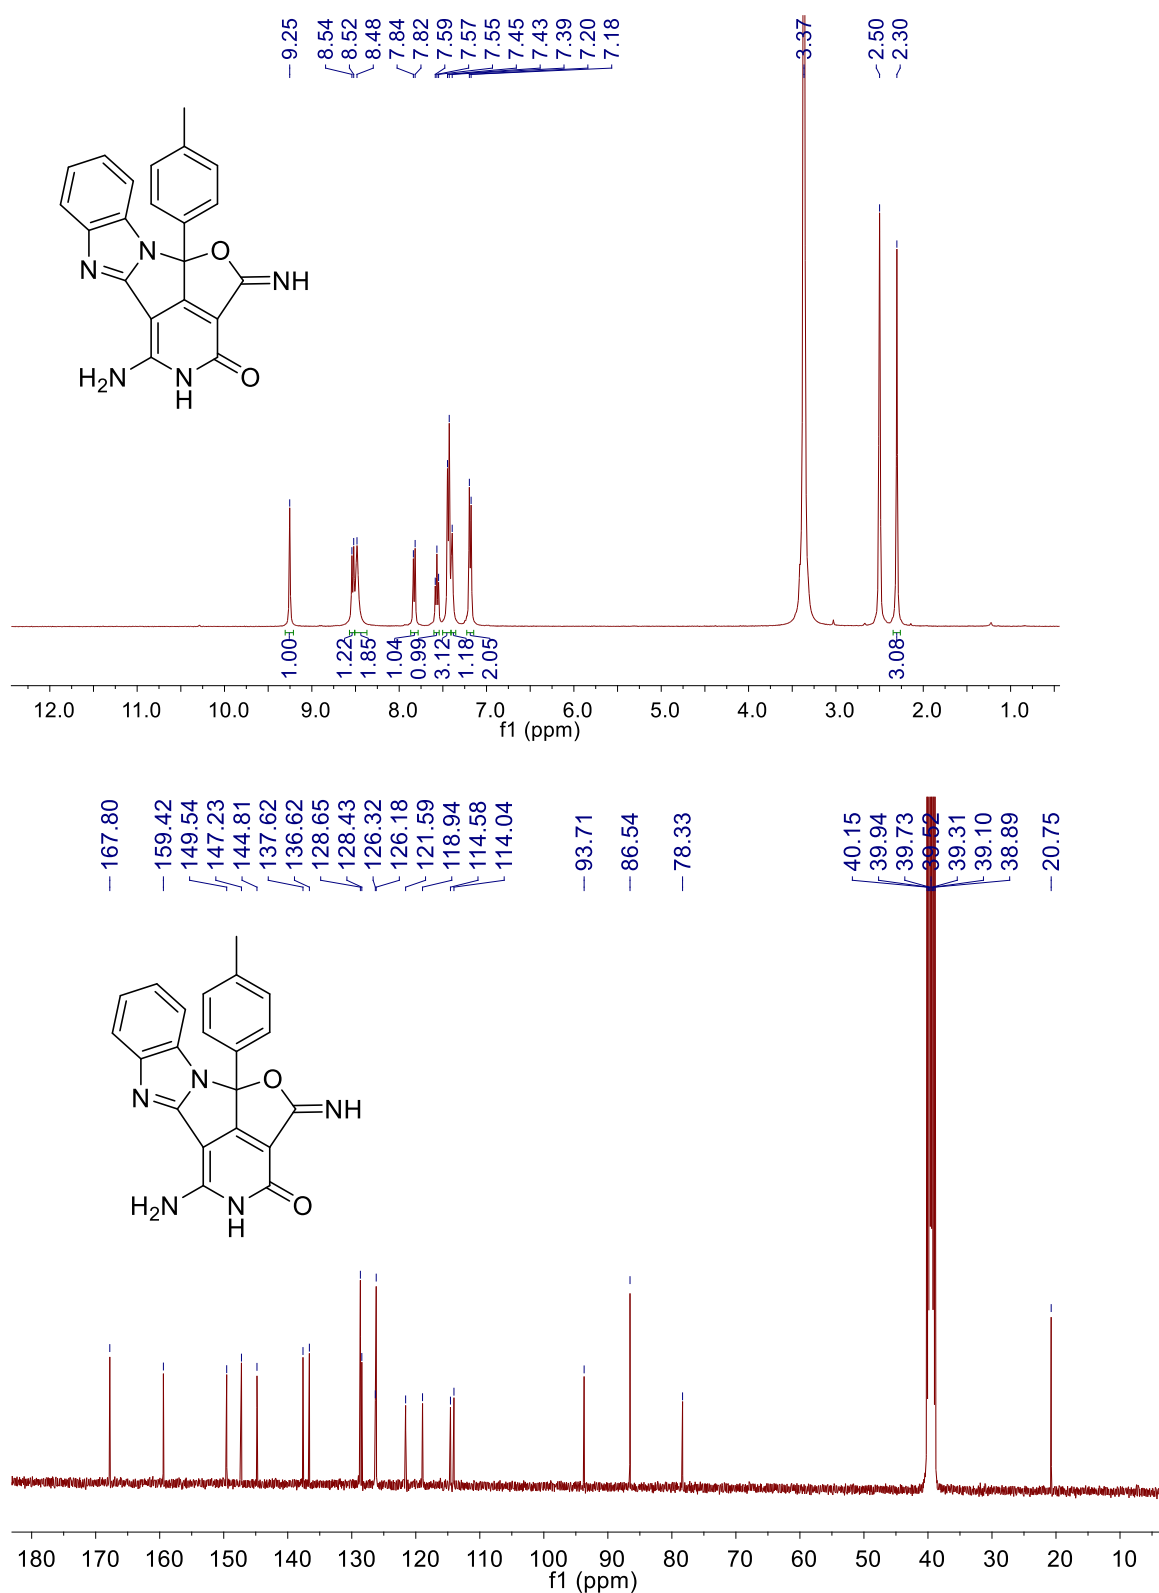

**Fig. 2** <sup>1</sup>H, <sup>13</sup>C spectrum of **5-amino-2-imino-10c-(p-tolyl)-2,10c-dihydro-1-oxa-4,6,10b-triazacyclopenta[1,2-a:5,4,3-c'd']diinden-3(4H)-one S1b**

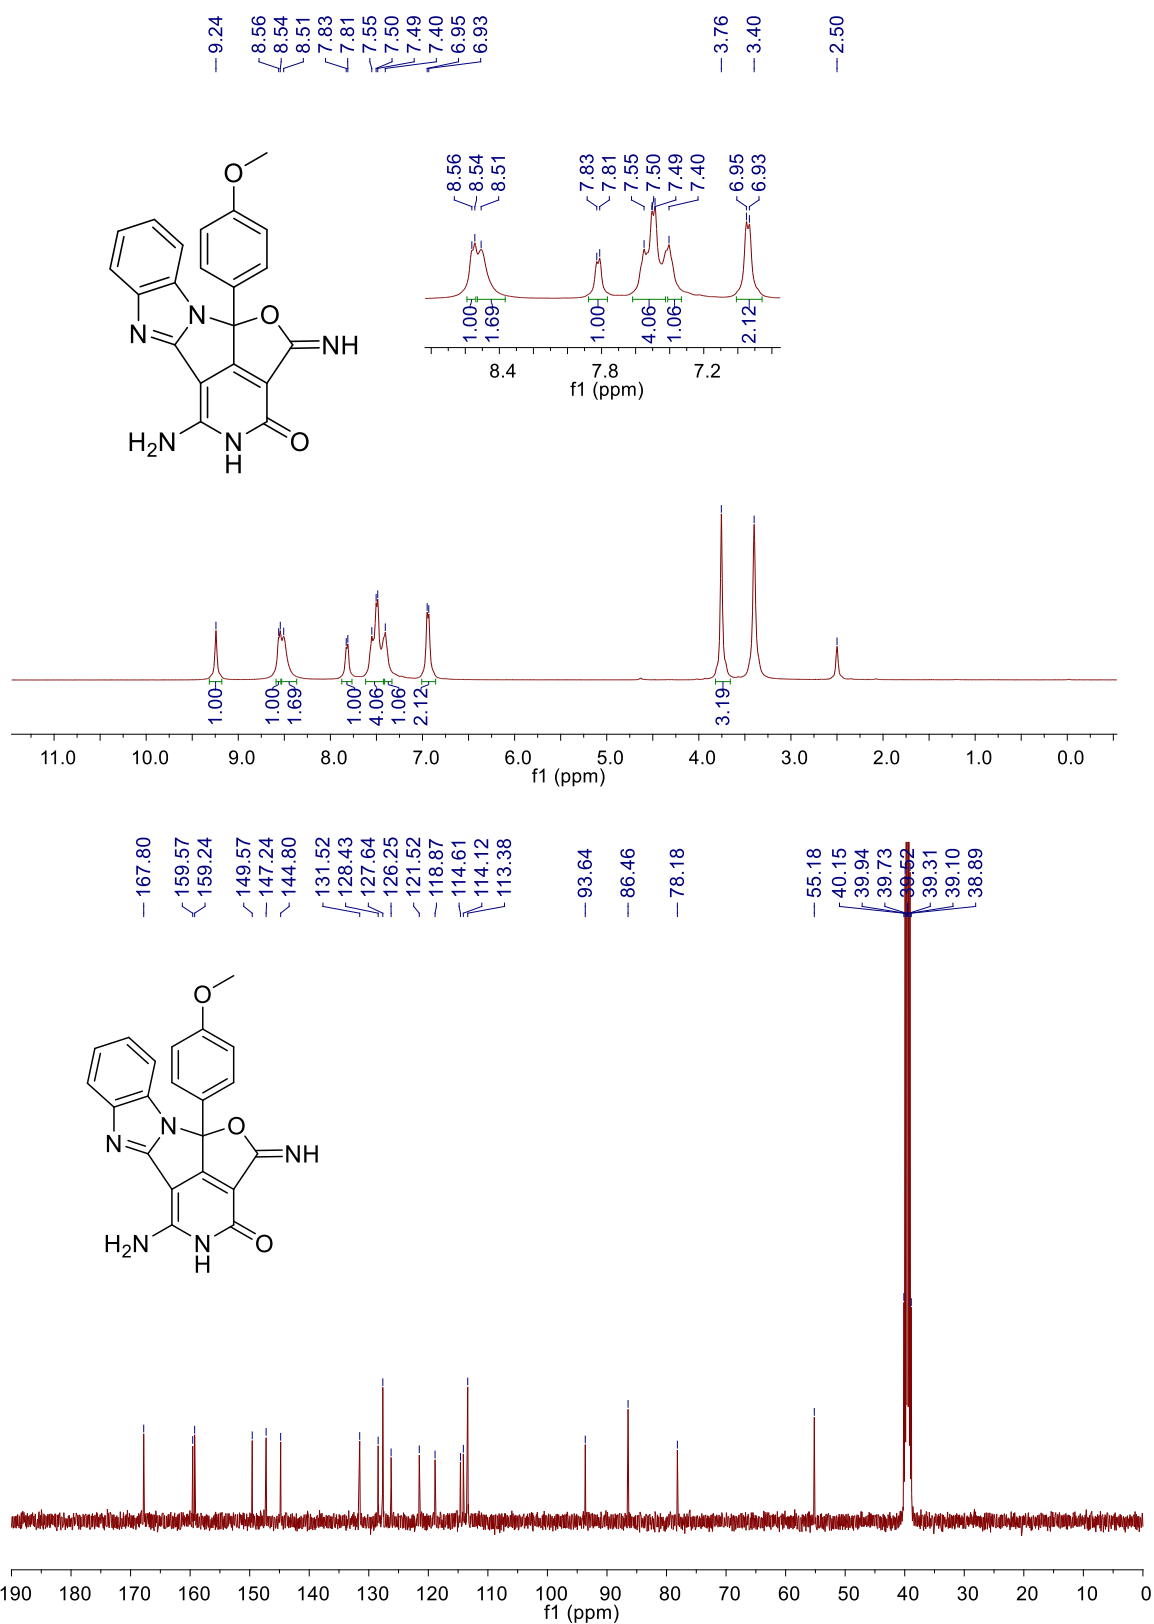

**Fig. 3** <sup>1</sup>H, <sup>13</sup>C spectrum of 5-amino-2-imino-10c-(4-methoxyphenyl)-2,10c-dihydro-1-oxa-4,6,10b-triazacyclopenta[1,2-a:5,4,3-c'd']diinden-3(4H)-one **S<sub>1c</sub>**

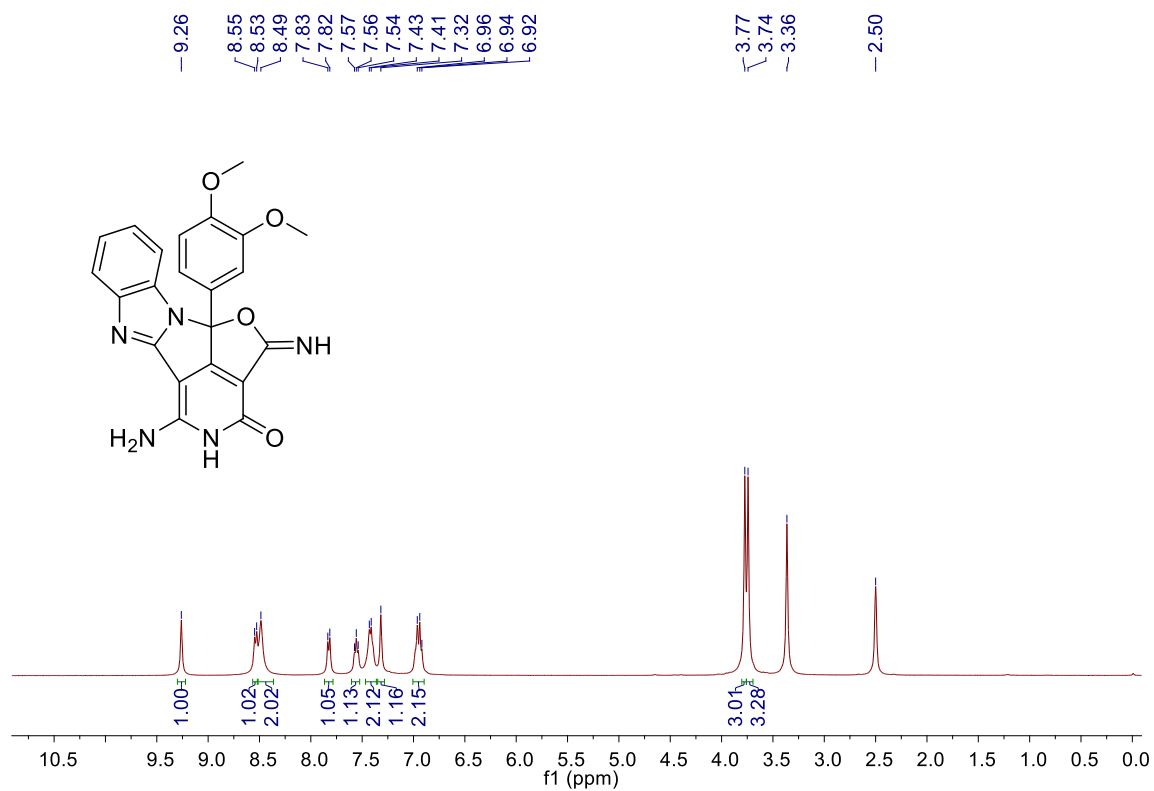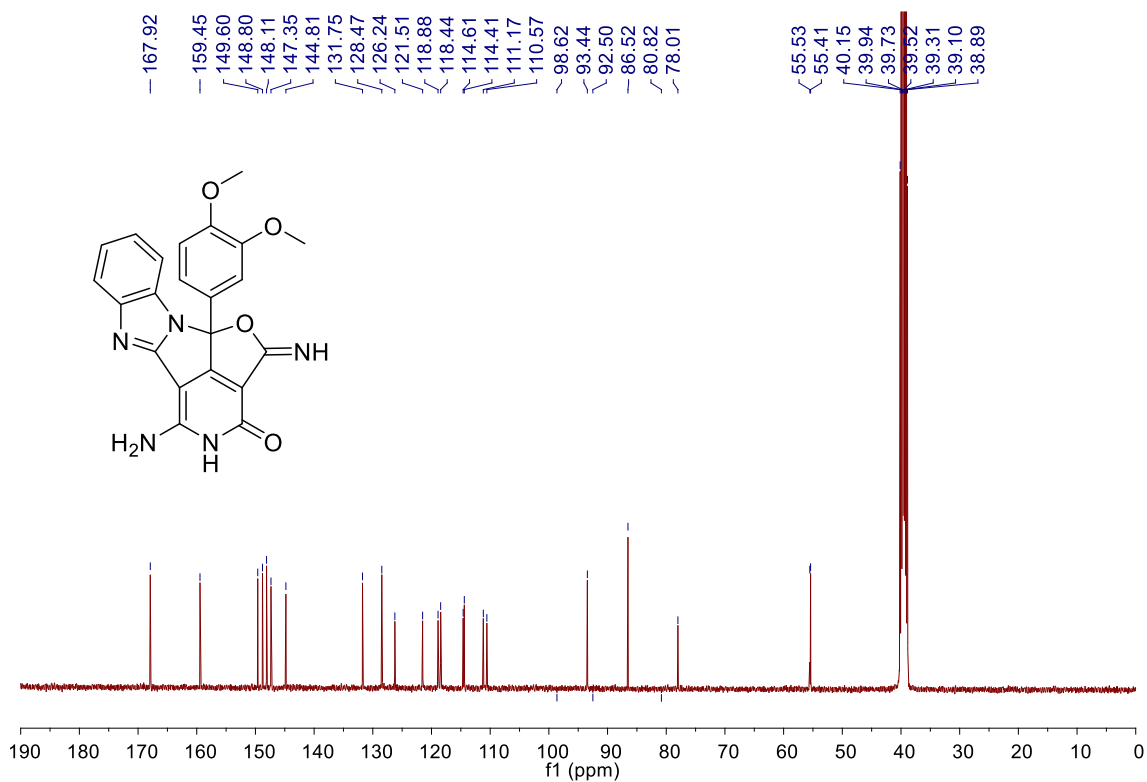

**Fig. 4** <sup>1</sup>H, <sup>13</sup>C spectrum of 5-amino-10c-(3,4-dimethoxyphenyl)-2-imino-2,10c-dihydro-1-oxa-4,6,10b-triazacyclo penta[1,2-a:5,4,3-c'd']diinden-3(4H)-one **S1a**

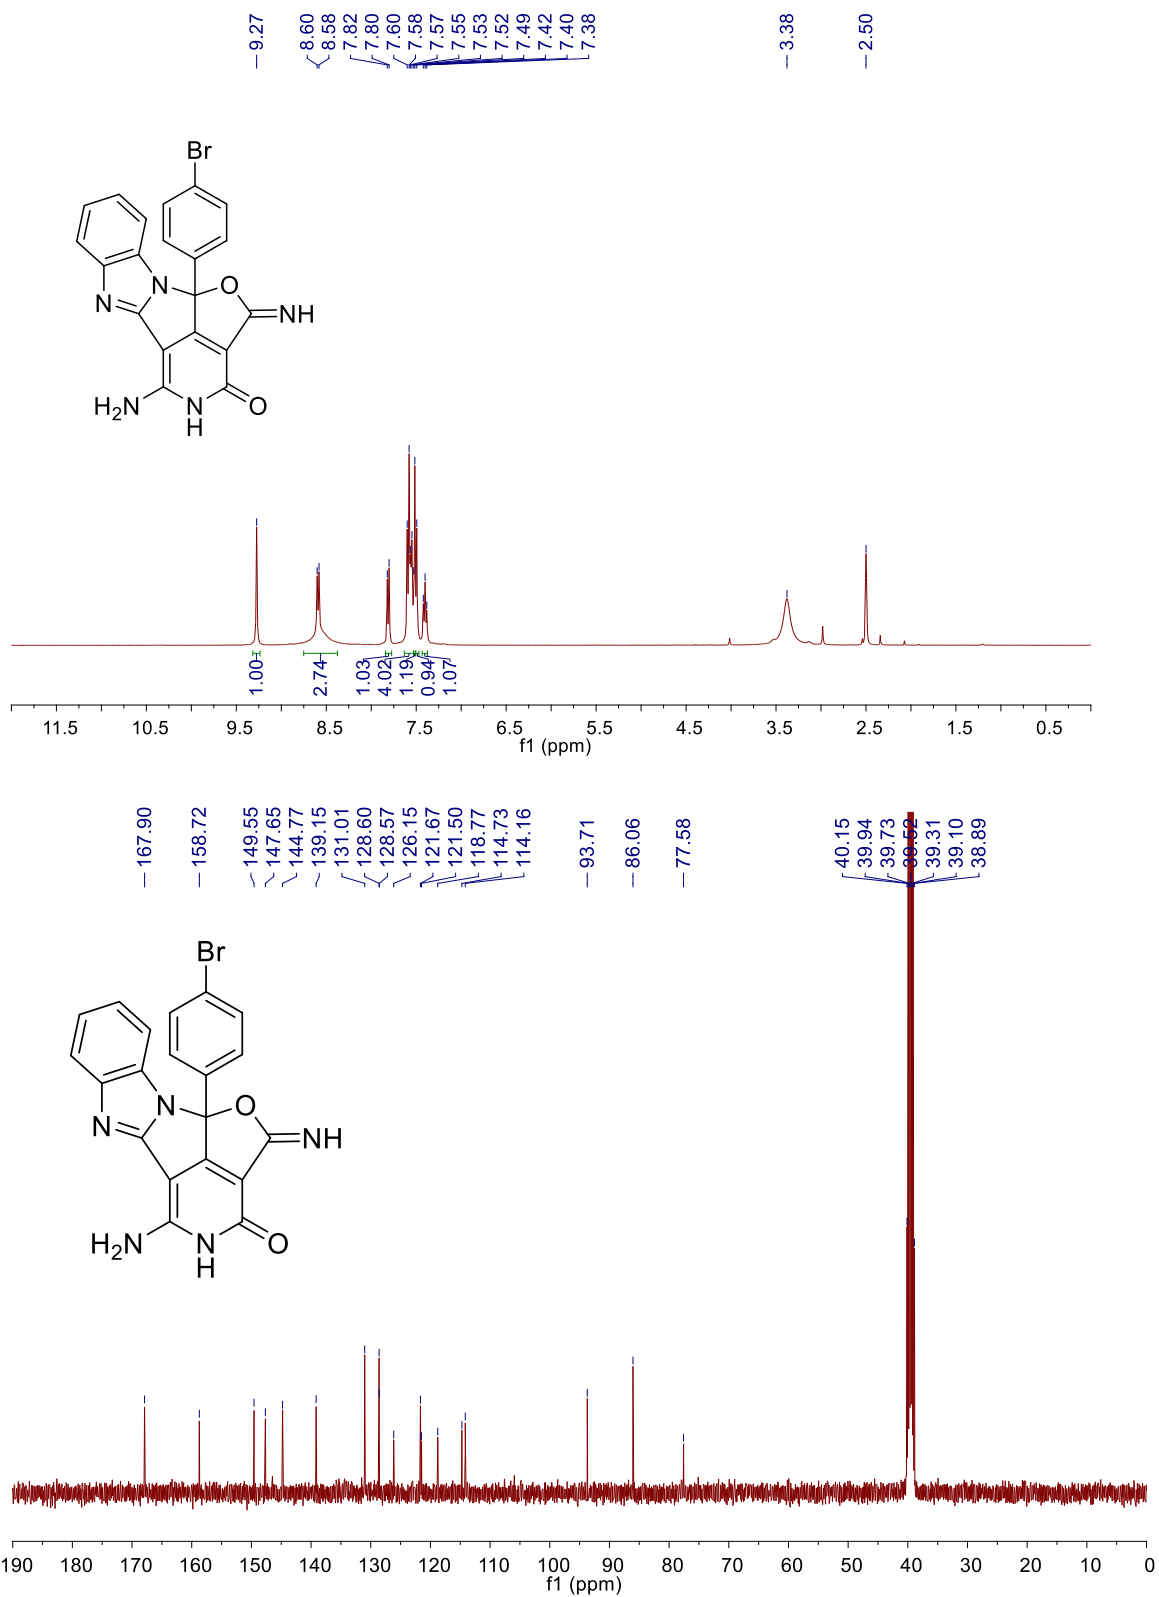

**Fig. 5** <sup>1</sup>H, <sup>13</sup>C spectrum of 5-amino-10c-(4-bromophenyl)-2-imino-2,10c-dihydro-1-oxa-4,6,10b-triazacyclopenta[1,2-a:5,4,3-c'-d']diinden-3(4H)-one **S<sub>1e</sub>**

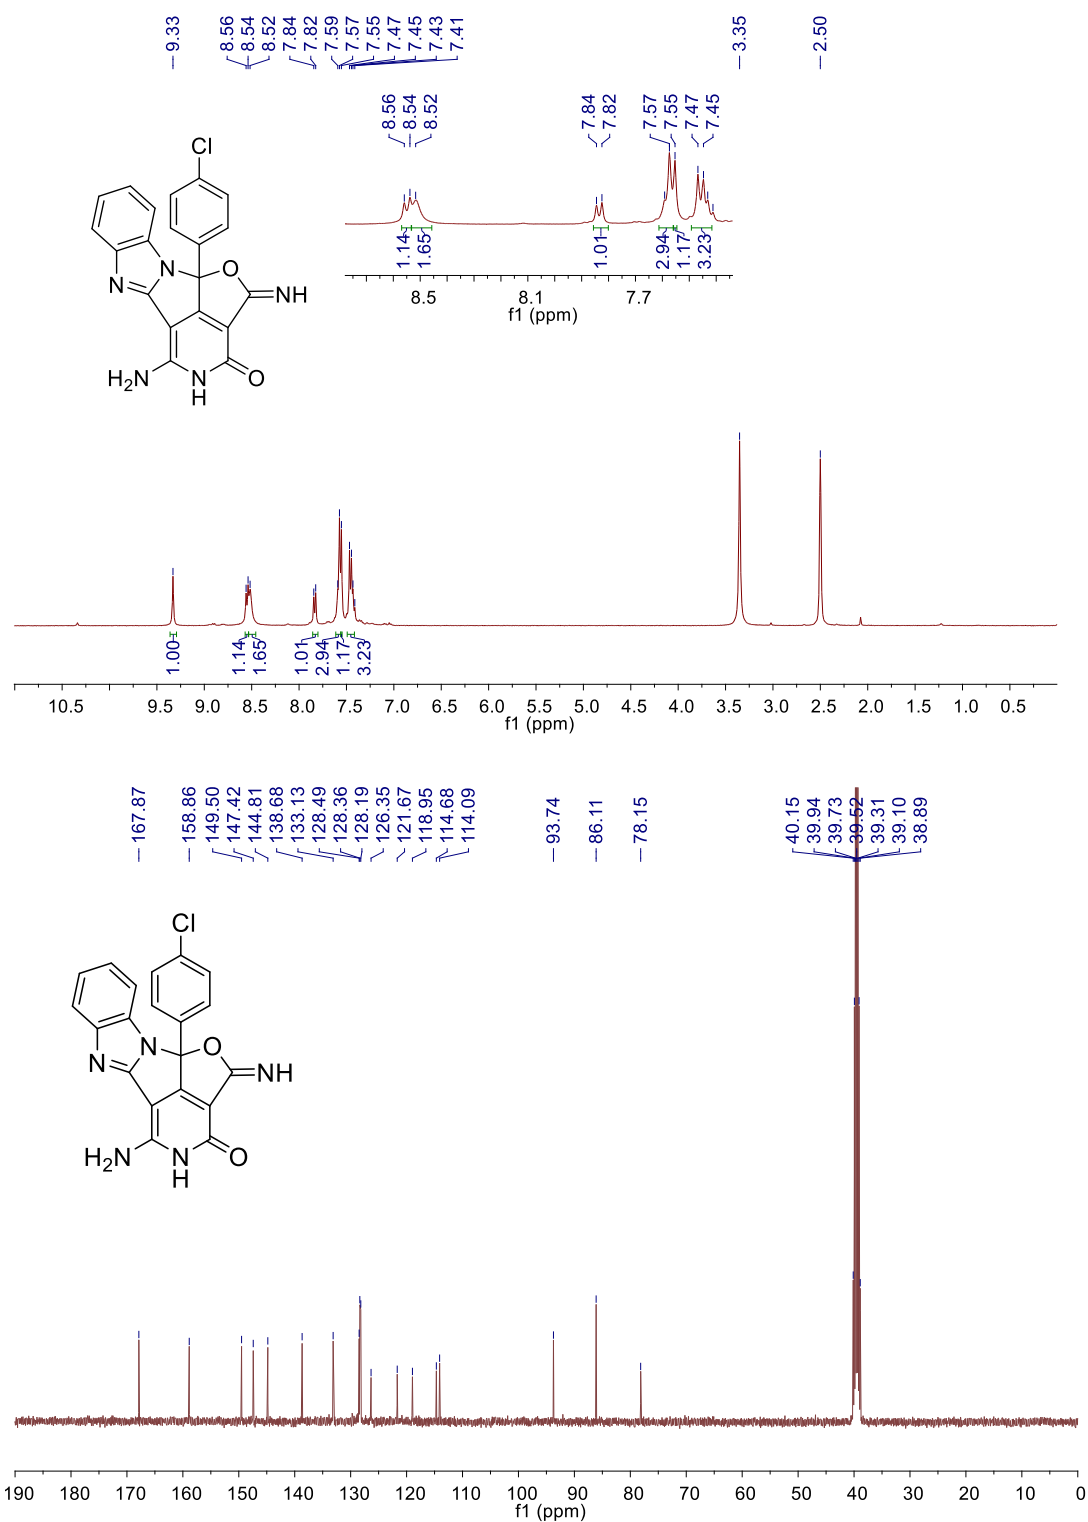

**Fig. 6**  $^1\text{H}$ ,  $^{13}\text{C}$  spectrum of 5-amino-10c-(4-chlorophenyl)-2-imino-2,10c-dihydro-1-oxa-4,6,10b-triazacyclopenta[1,2-a:5,4,3-c'd']diinden-3(4H)-one **S1r**

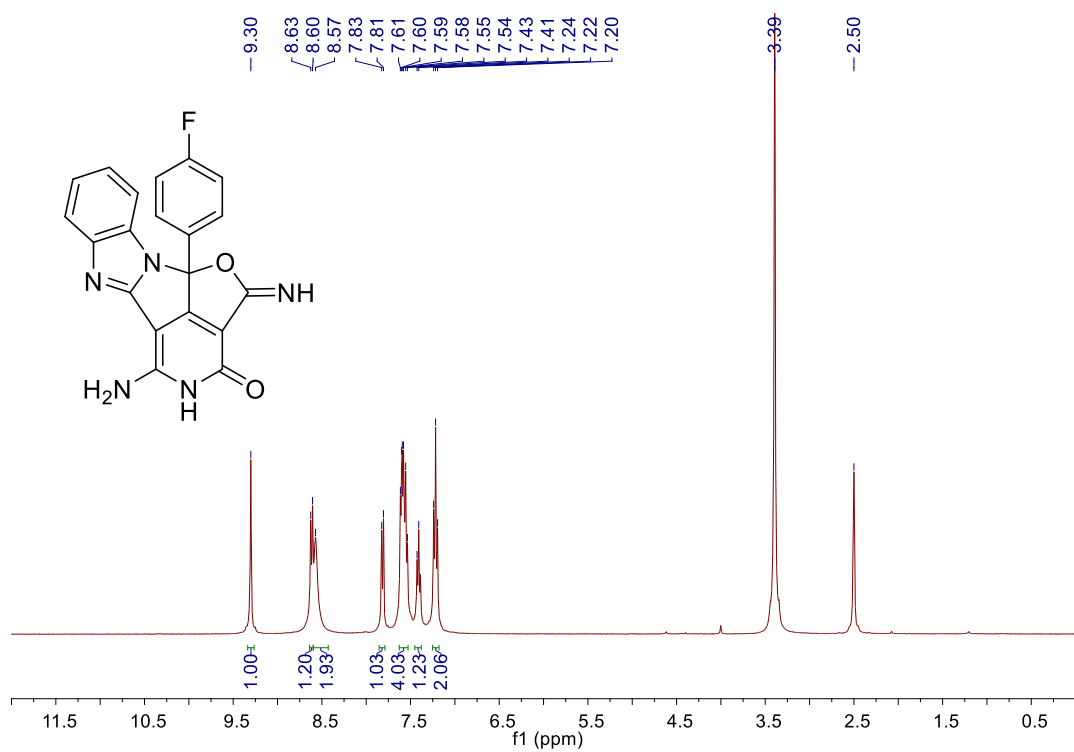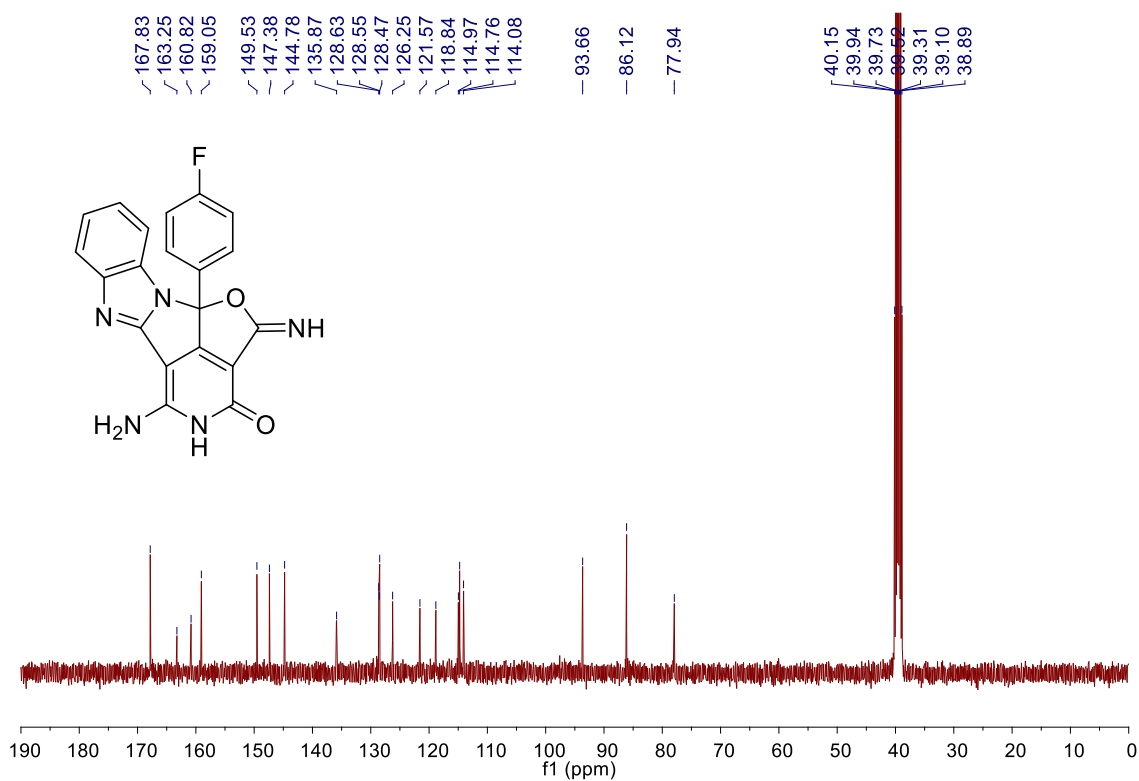

**Fig.7** <sup>1</sup>H, <sup>13</sup>C spectrum of 5-amino-10c-(4-fluorophenyl)-2-imino-2,10c-dihydro-1-oxa-4,6,10b-triazacyclopenta[1,2-a:5,4,3-c'd']diinden-3(4H)-one **S<sub>1g</sub>**



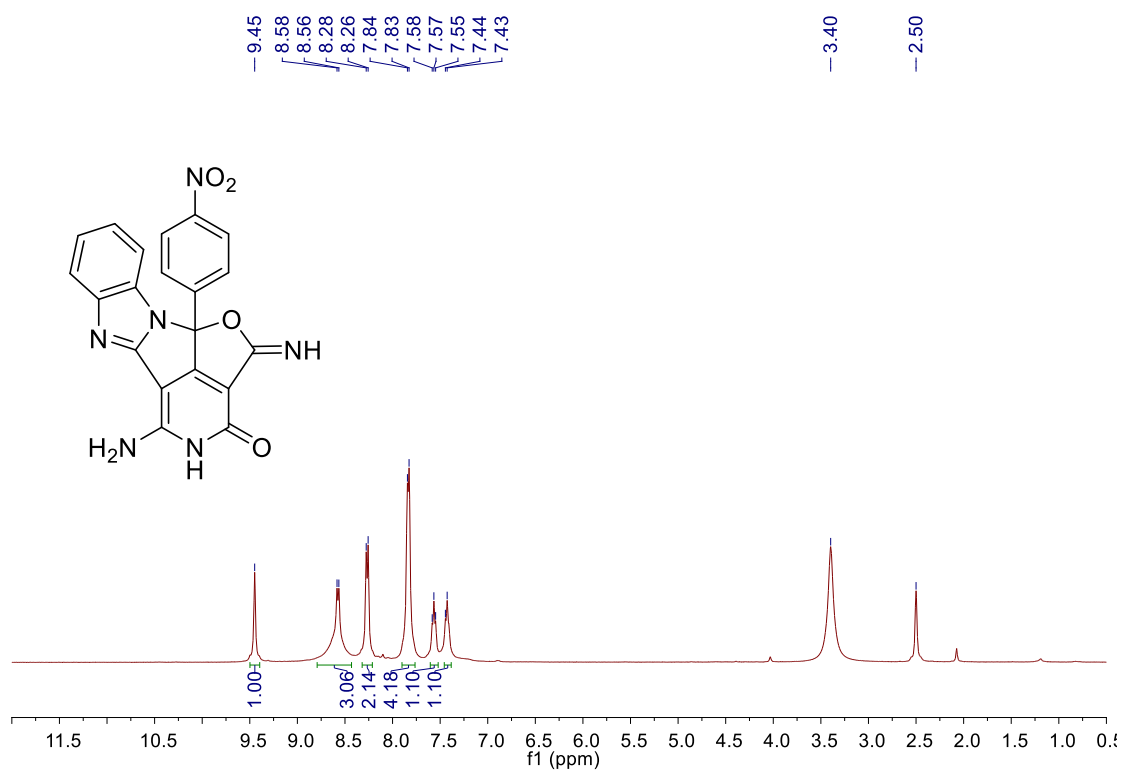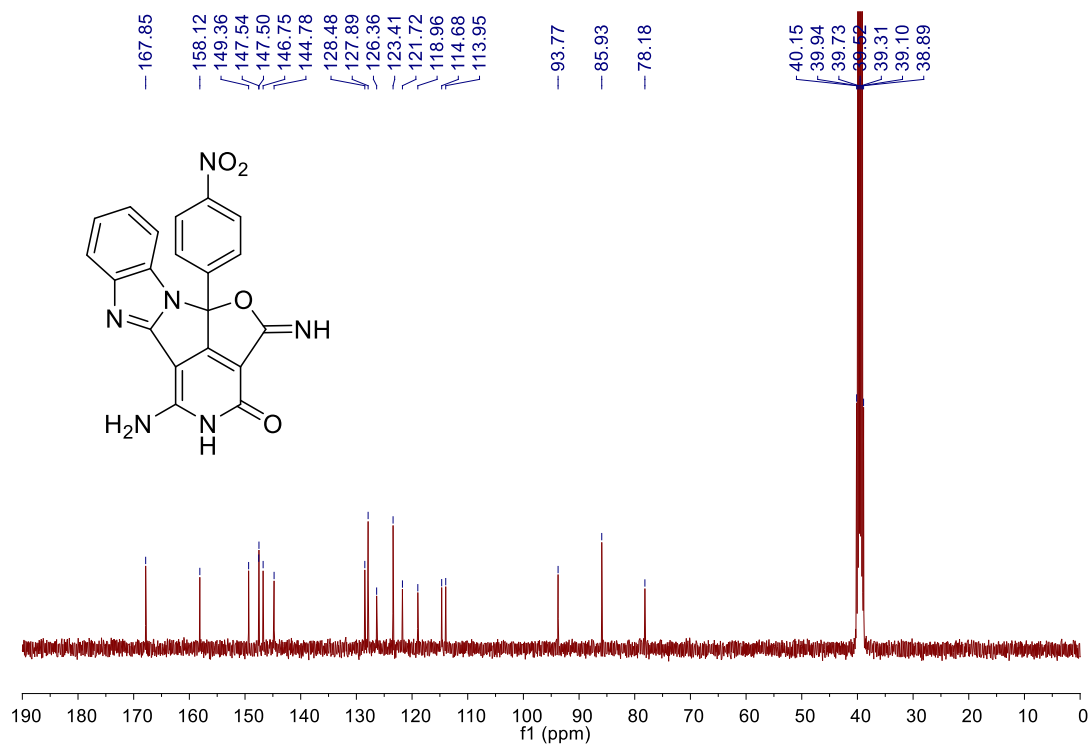

**Fig. 8** <sup>1</sup>H, <sup>13</sup>C spectrum of 5-amino-2-imino-10c-(4-nitrophenyl)-2,10c-dihydro-1-oxa-4,6,10b-triazacyclopenta[1,2-a:5,4,3-c'd']diinden-3(4H)-one **S1h**

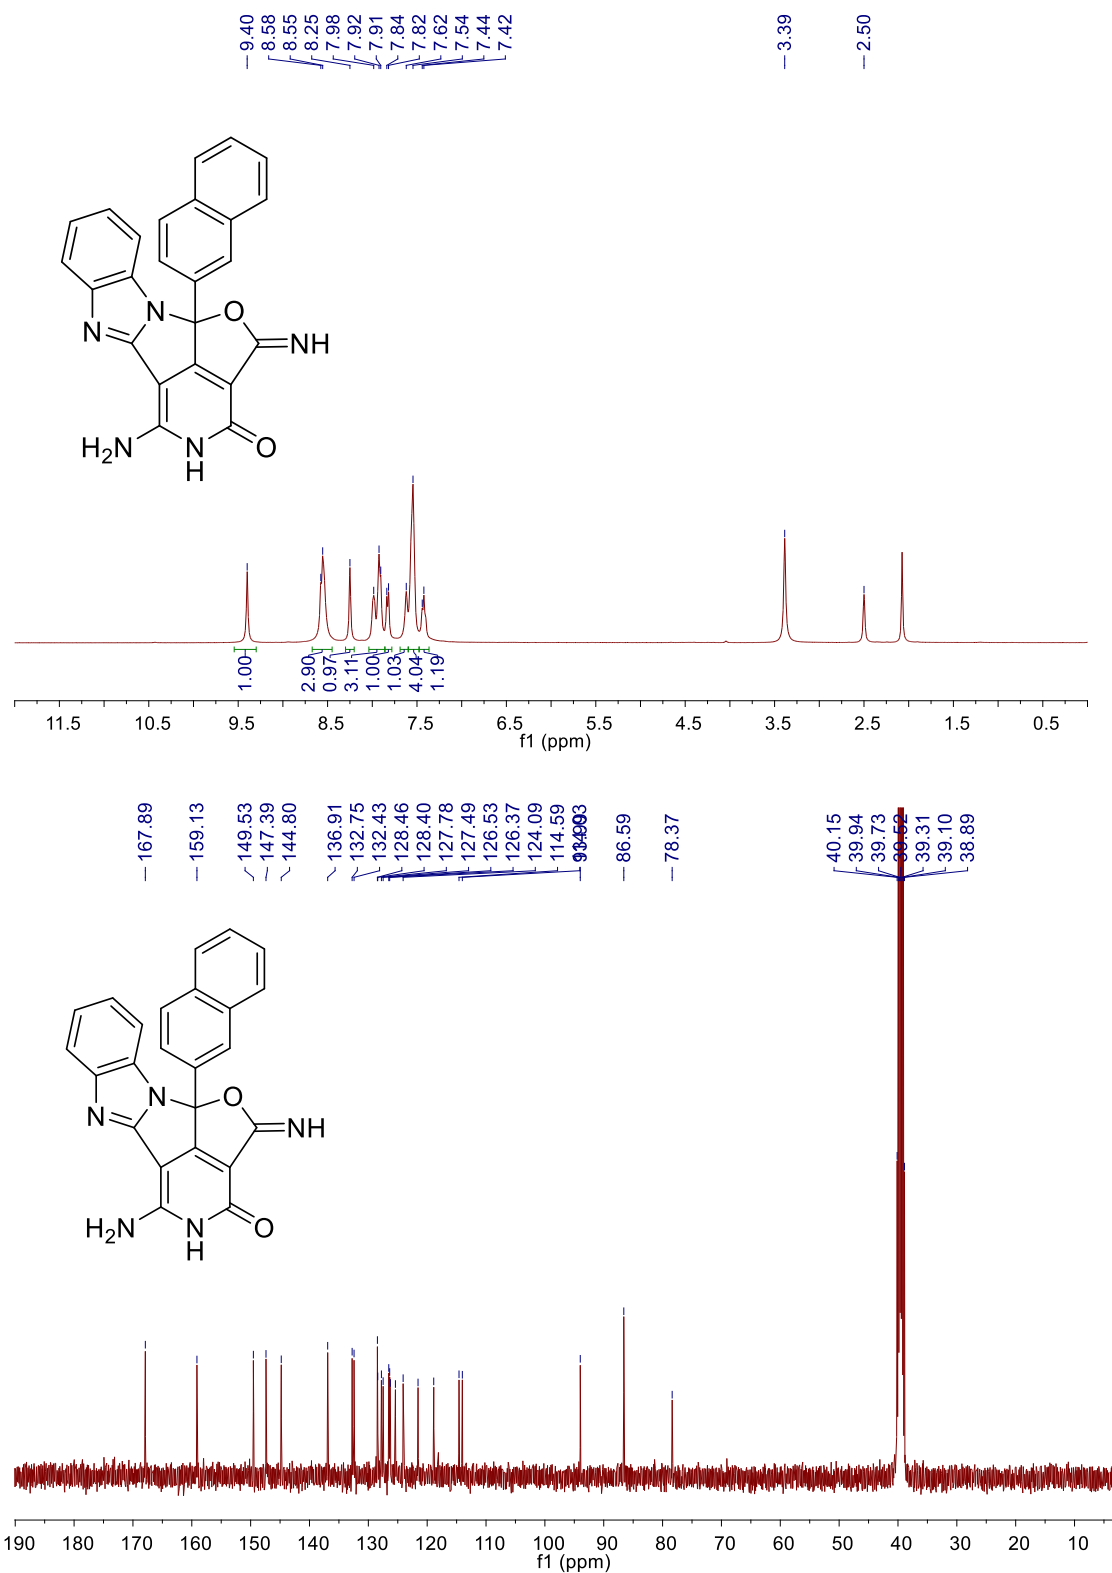

**Fig. 9** <sup>1</sup>H, <sup>13</sup>C spectrum of 5-amino-2-imino-10c-(naphthalen-2-yl)-2,10c-dihydro-1-oxa-4,6,10b-triazacyclopenta[1,2-a:5,4,3-c'd']diinden-3(4H)-one **S<sub>11</sub>**

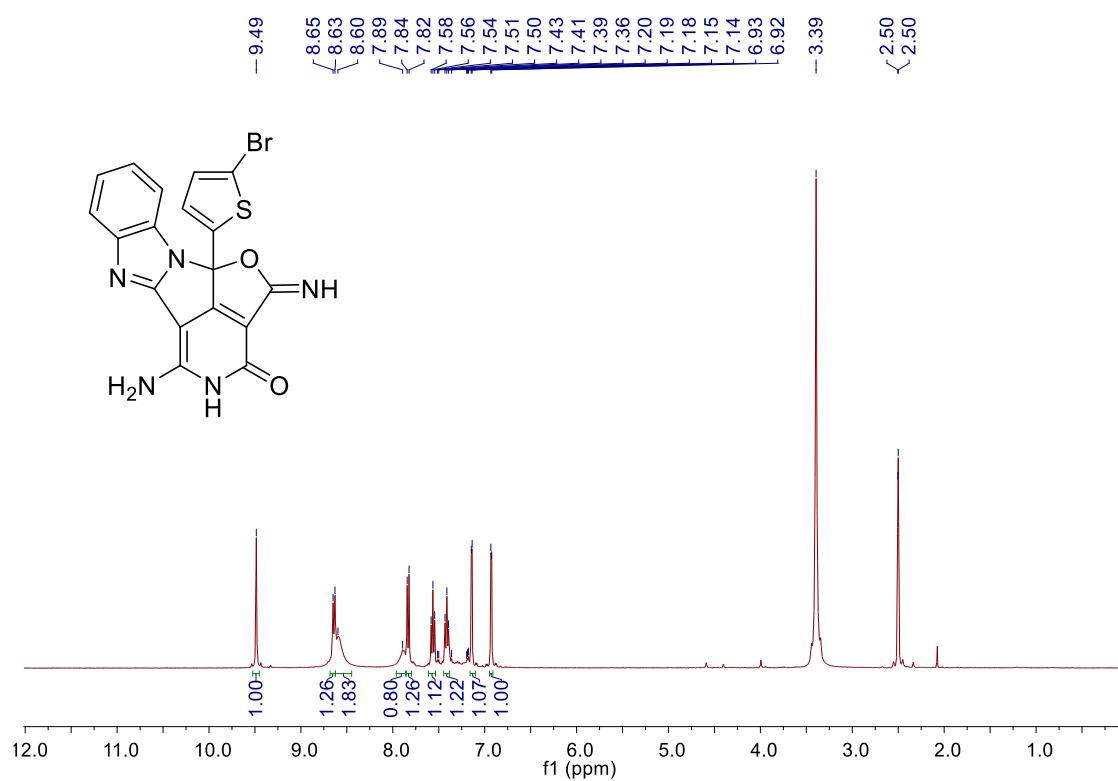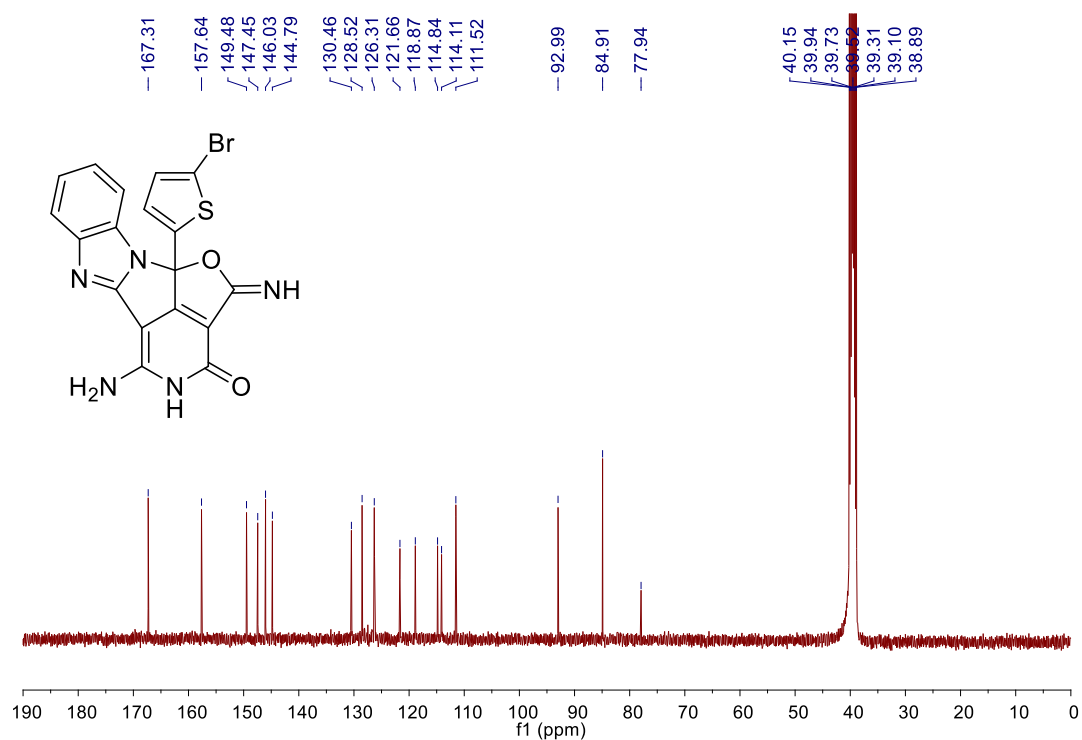

**Fig. 10** <sup>1</sup>H, <sup>13</sup>C spectrum of 5-amino-10c-(5-bromothiophen-2-yl)-2-imino-2,10c-dihydro-1-oxa-4,6,10b-triazacyclopenta[1,2-a:5,4,3-c'd']diinden-3(4H)-one **S<sub>1j</sub>**

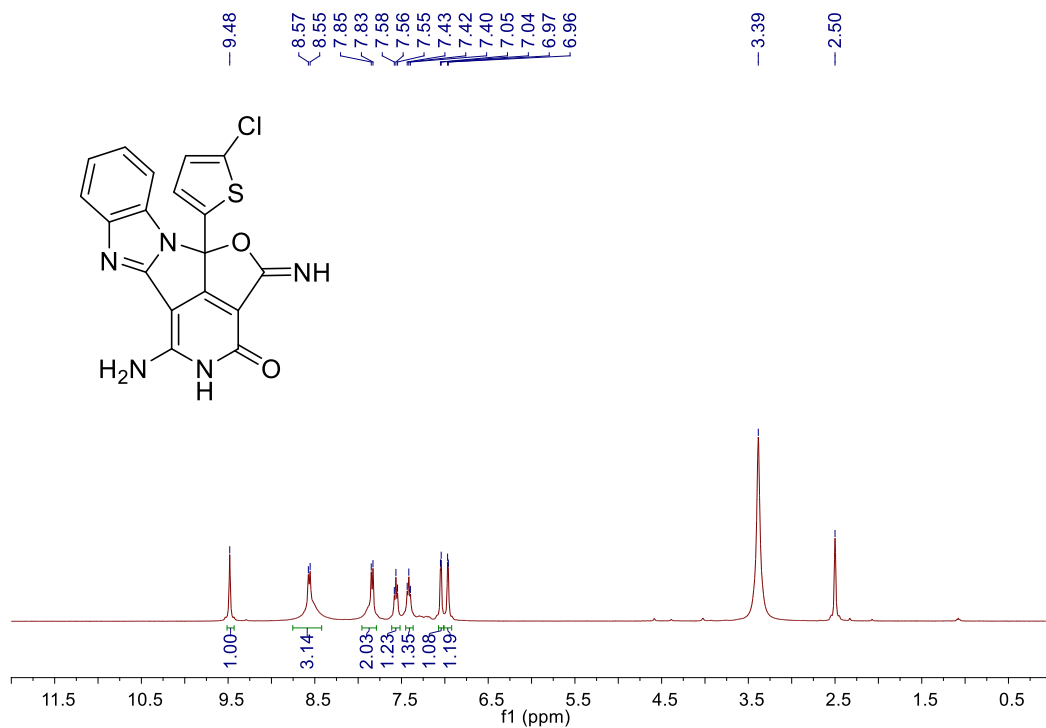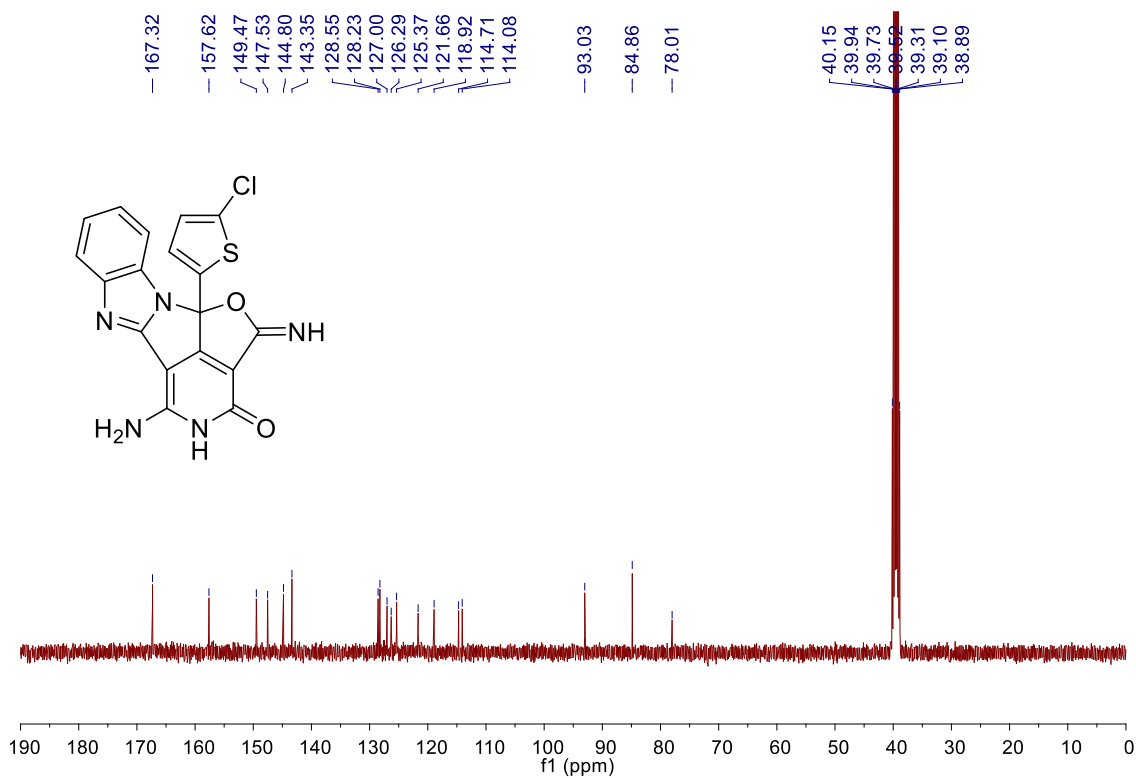

**Fig. 11** <sup>1</sup>H, <sup>13</sup>C spectrum of 5-amino-10c-(5-chlorothiophen-2-yl)-2-imino-2,10c-dihydro-1-oxa-4,6,10b-triazacyclopenta[1,2-a:5,4,3-c'd']diinden-3(4H)-one **S<sub>1k</sub>**

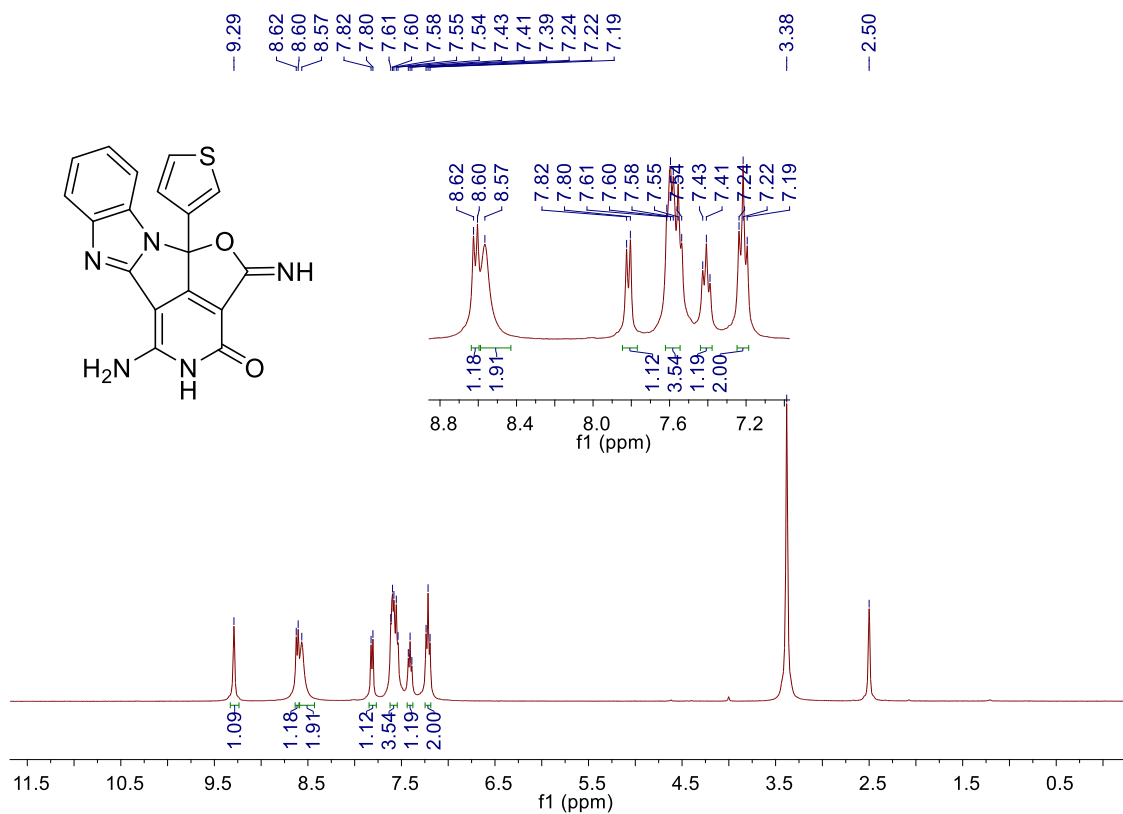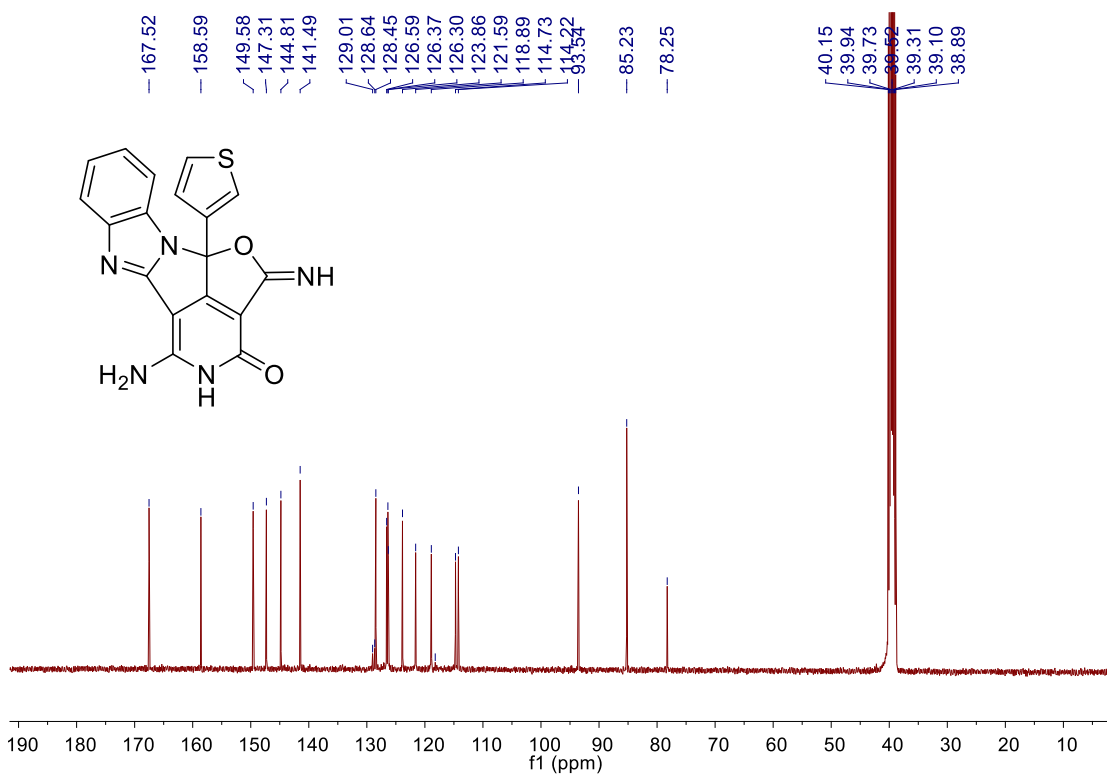

**Fig. 12**  $^1\text{H}$ ,  $^{13}\text{C}$  spectrum of 5-amino-2-imino-10c-(thiophen-3-yl)-2,10c-dihydro-1-oxa-4,6,10b-triazacyclopenta[1,2-a:5,4,3-c'd']diinden-3(4H)-one **S<sub>11</sub>**

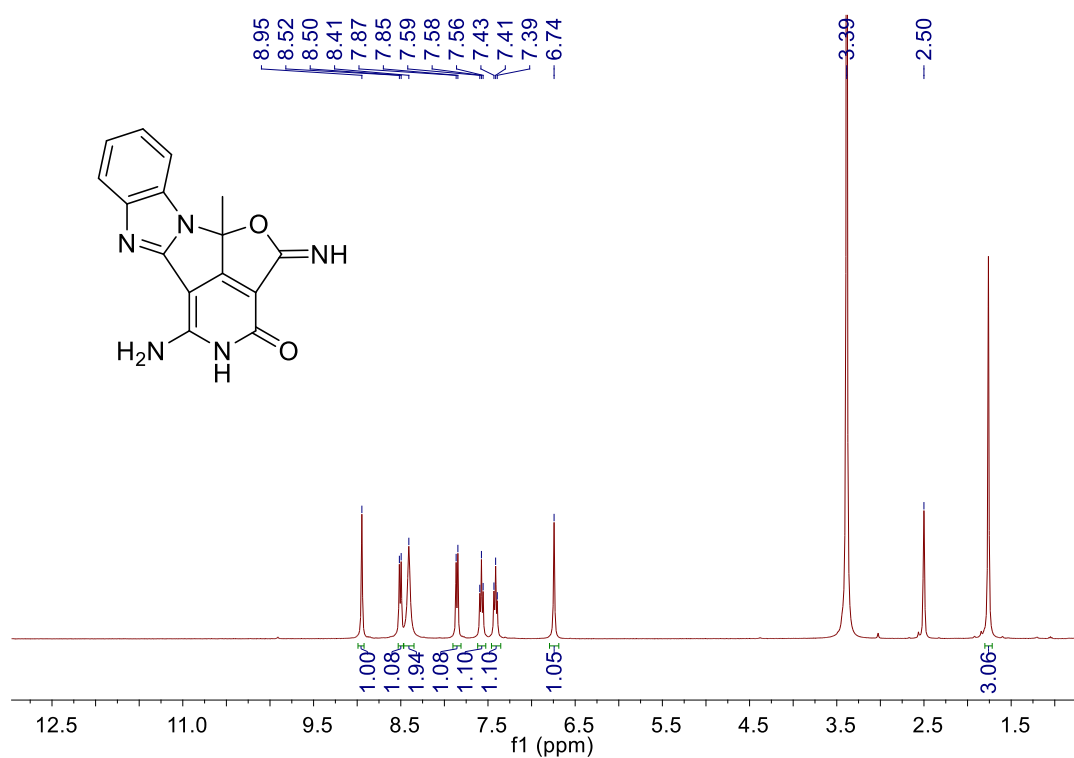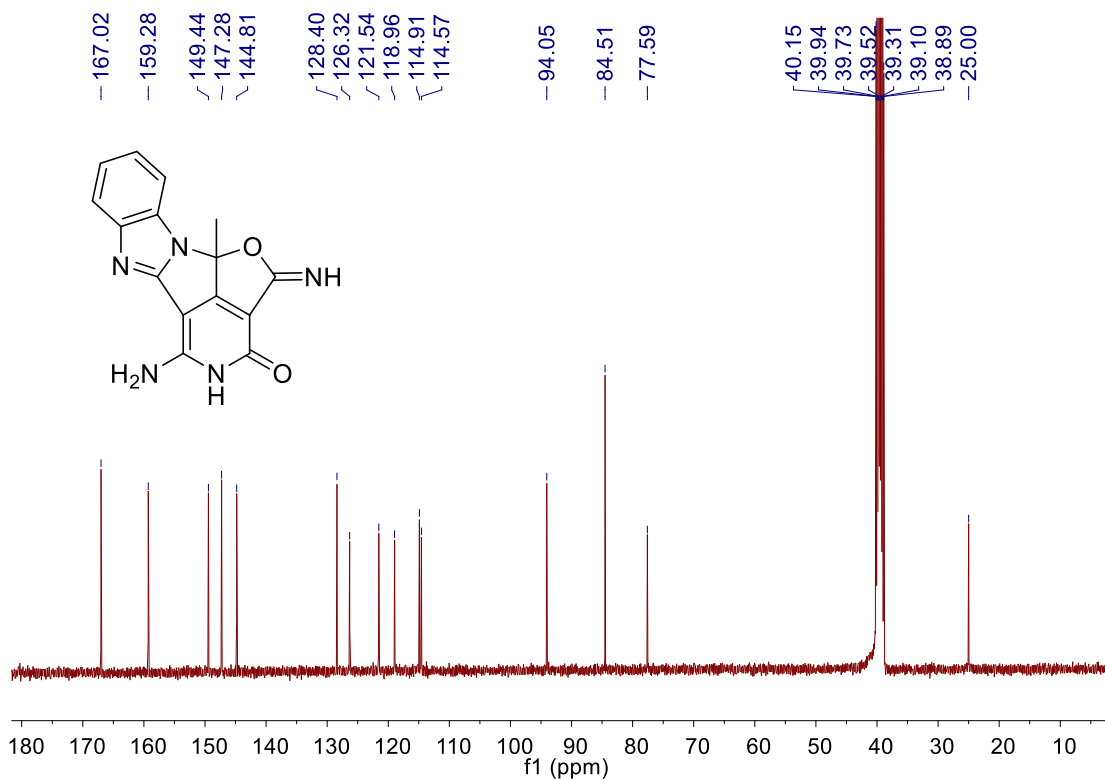

**Fig. 13**  $^1\text{H}$ ,  $^{13}\text{C}$  spectrum of 5-amino-2-imino-10c-methyl-2,10c-dihydro-1-oxa-4,6,10b-triazacyclopenta[1,2-a:5,4,3-c'd']diinden-3(4H)-one **S<sub>1m</sub>**

### **Synthetic procedure for the synthesis of pyrrolo[3,4-d]pyridine-13-carboxamide S<sub>2</sub>**

A three component reaction was performed between 4-methyl phenylglyoxal (1mmol) (**A<sub>2</sub>**), benzimidazole acetonitrile (**B<sub>1</sub>**) (2mmol) in the presence of mild base catalyst as DABCO at room temperature in ethanol were taken in round bottom flask. The progress of the reaction was monitored by TLC for completion of the reaction. The reaction mixture formed yellow precipitate to afford the required product in 30 min. The precipitate washed with 10 mL of EtOH solvent to remove unreacted starting material and finally observed yellow solid yield of 80%. It was showed single spot in checking TLC and the crude product was confirmed by <sup>1</sup>H NMR, <sup>13</sup>C NMR and HRMS spectra without further purification.

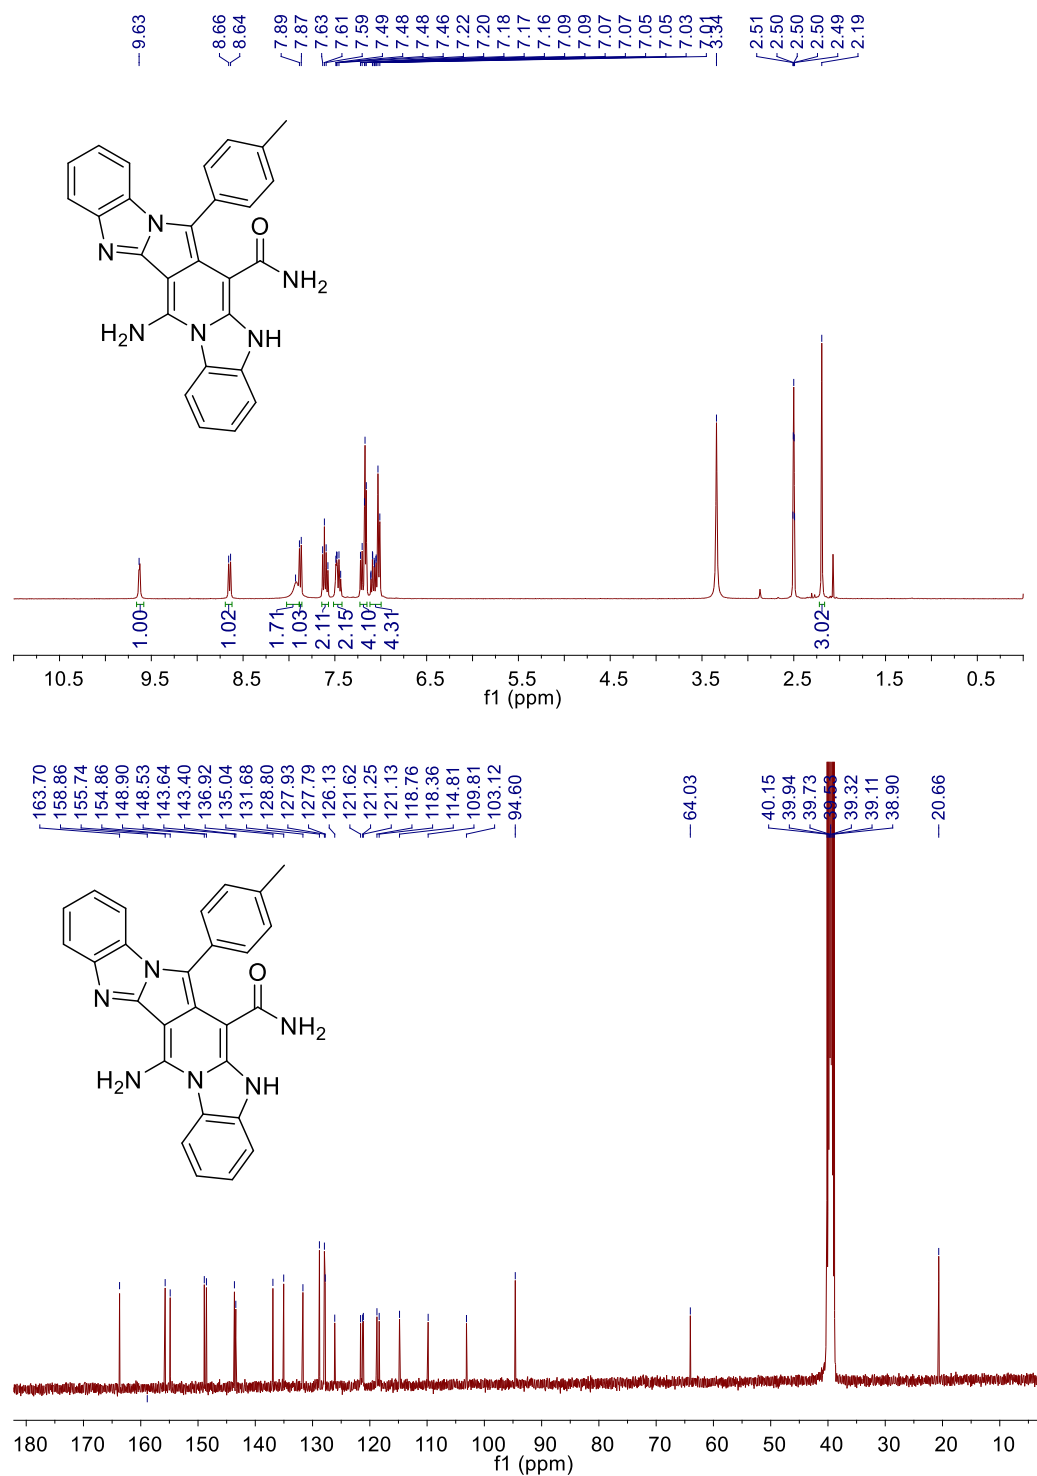

**Fig. 14** <sup>1</sup>H, <sup>13</sup>C spectrum of 6-amino-14-(p-tolyl)-12H-benzo[4',5']imidazo[1',2':1,5]pyrrolo[3,4-d]benzo[4,5]imidazo [1,2-a]pyridine-13-carboxamide **S<sub>2a</sub>**



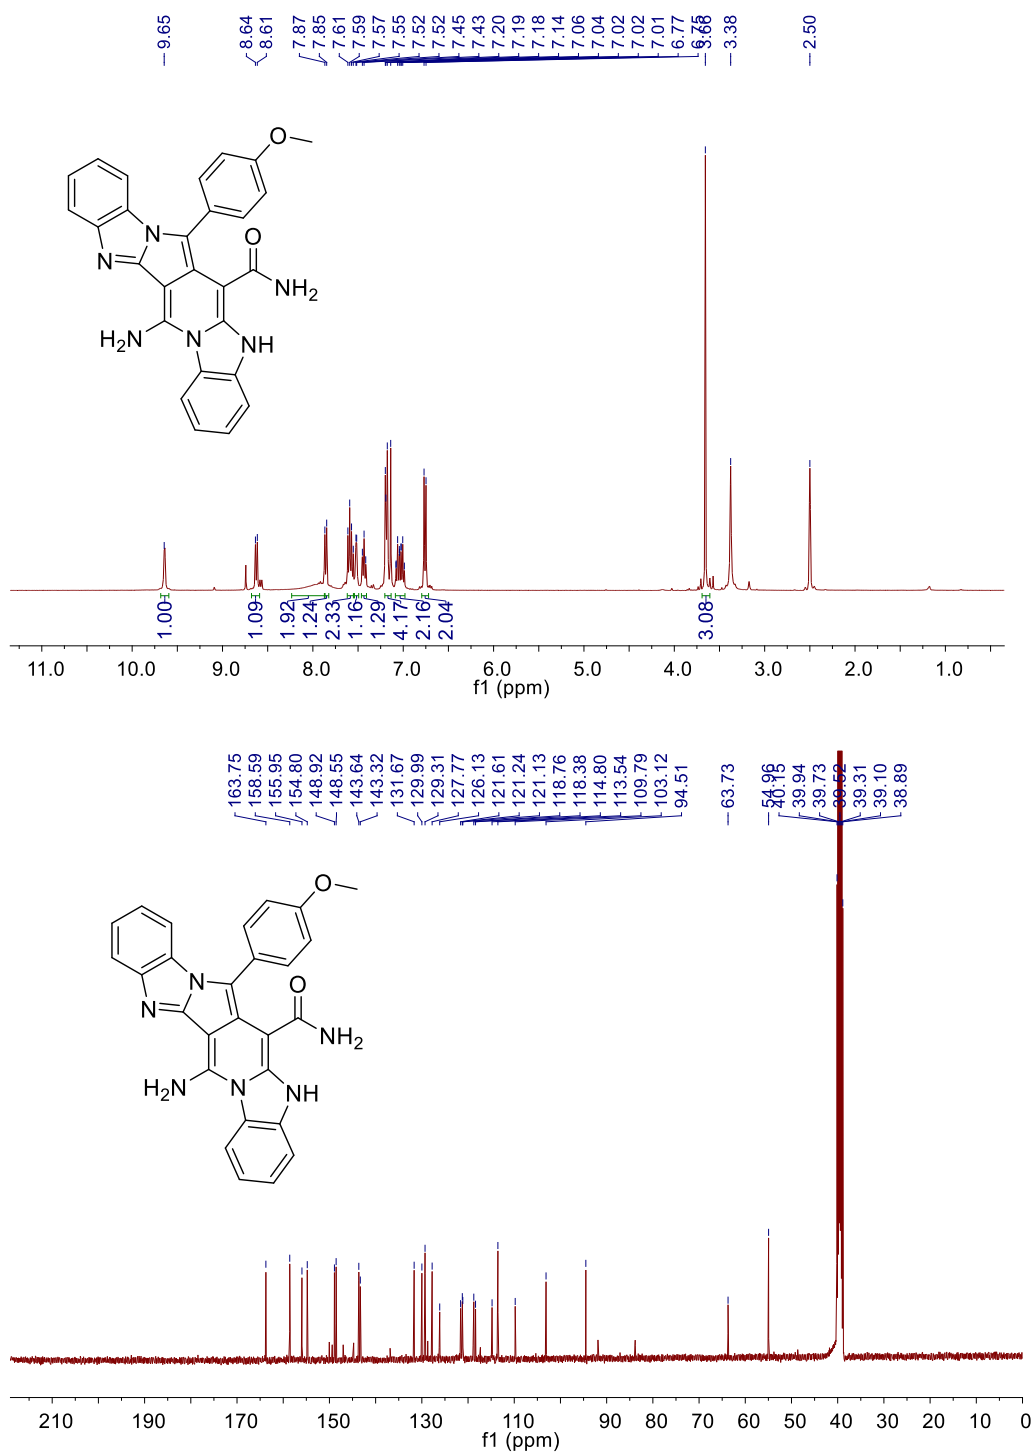

**Fig. 15** <sup>1</sup>H, <sup>13</sup>C spectrum of 6-amino-14-(4-methoxyphenyl)-12H-benzo[4',5']imidazo[1',2':1,5] pyrrolo[3,4-d]benzo[4,5] imidazo[1,2-a]pyridine-13-carboxamide **S2b**

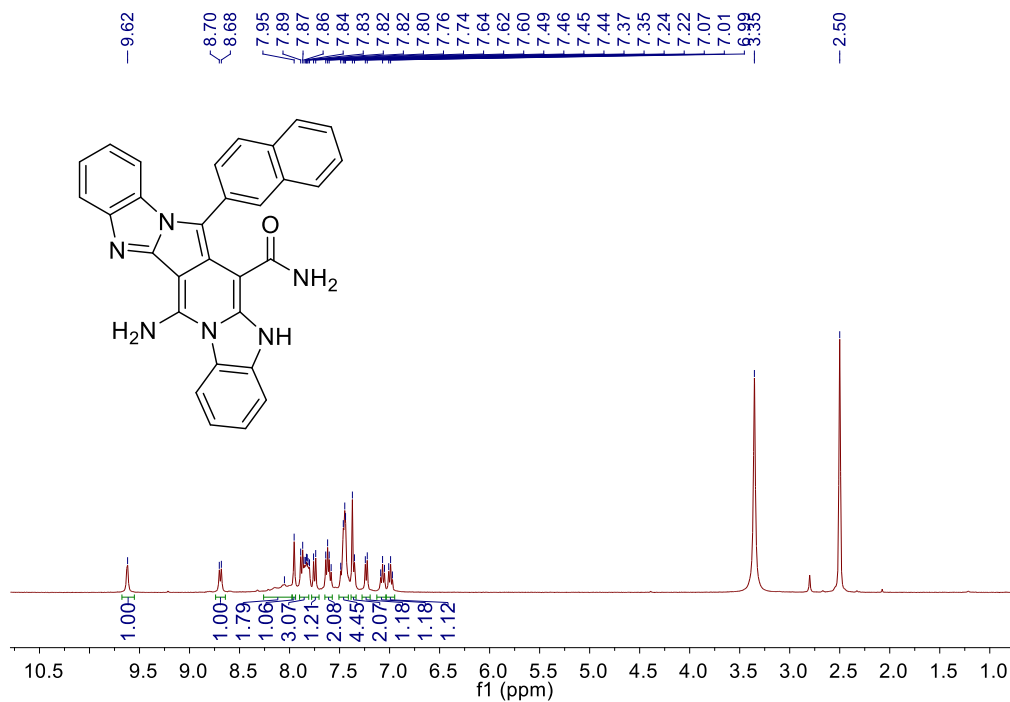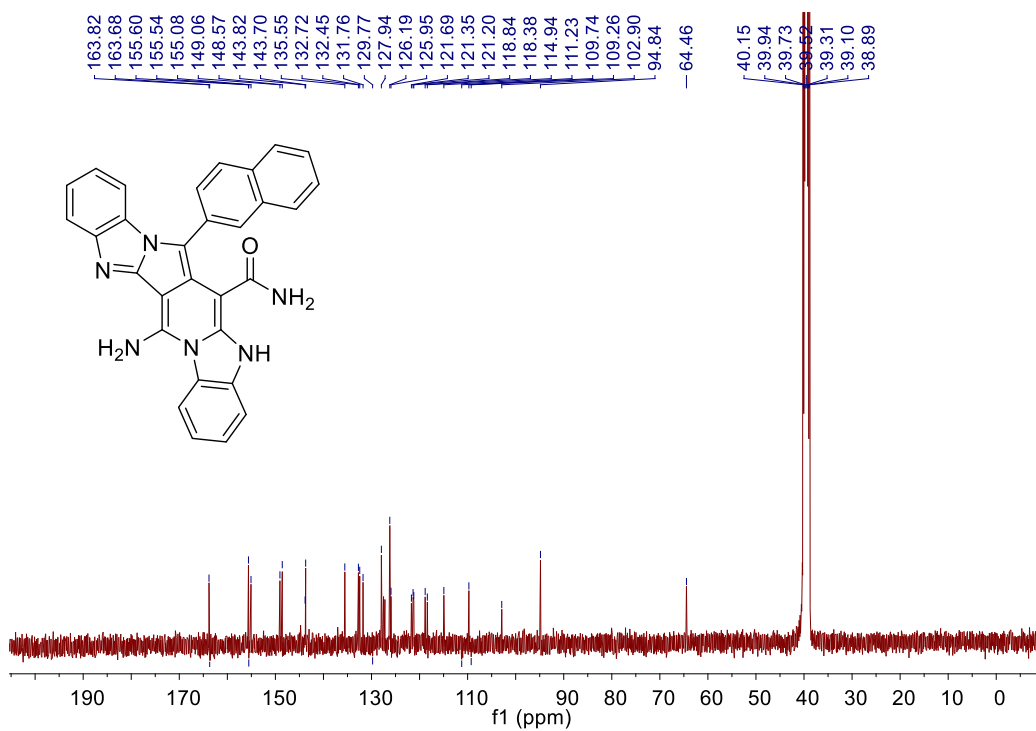

**Fig. 16** <sup>1</sup>H, <sup>13</sup>C spectrum of 6-amino-14-(naphthalen-2-yl)-12H-benzo[4',5']imidazo[1',2':1,5]pyrrolo[3,4-d]benzo[4,5]imidazo[1,2-a]pyridine-13-carboxamide **S**<sub>2c</sub>

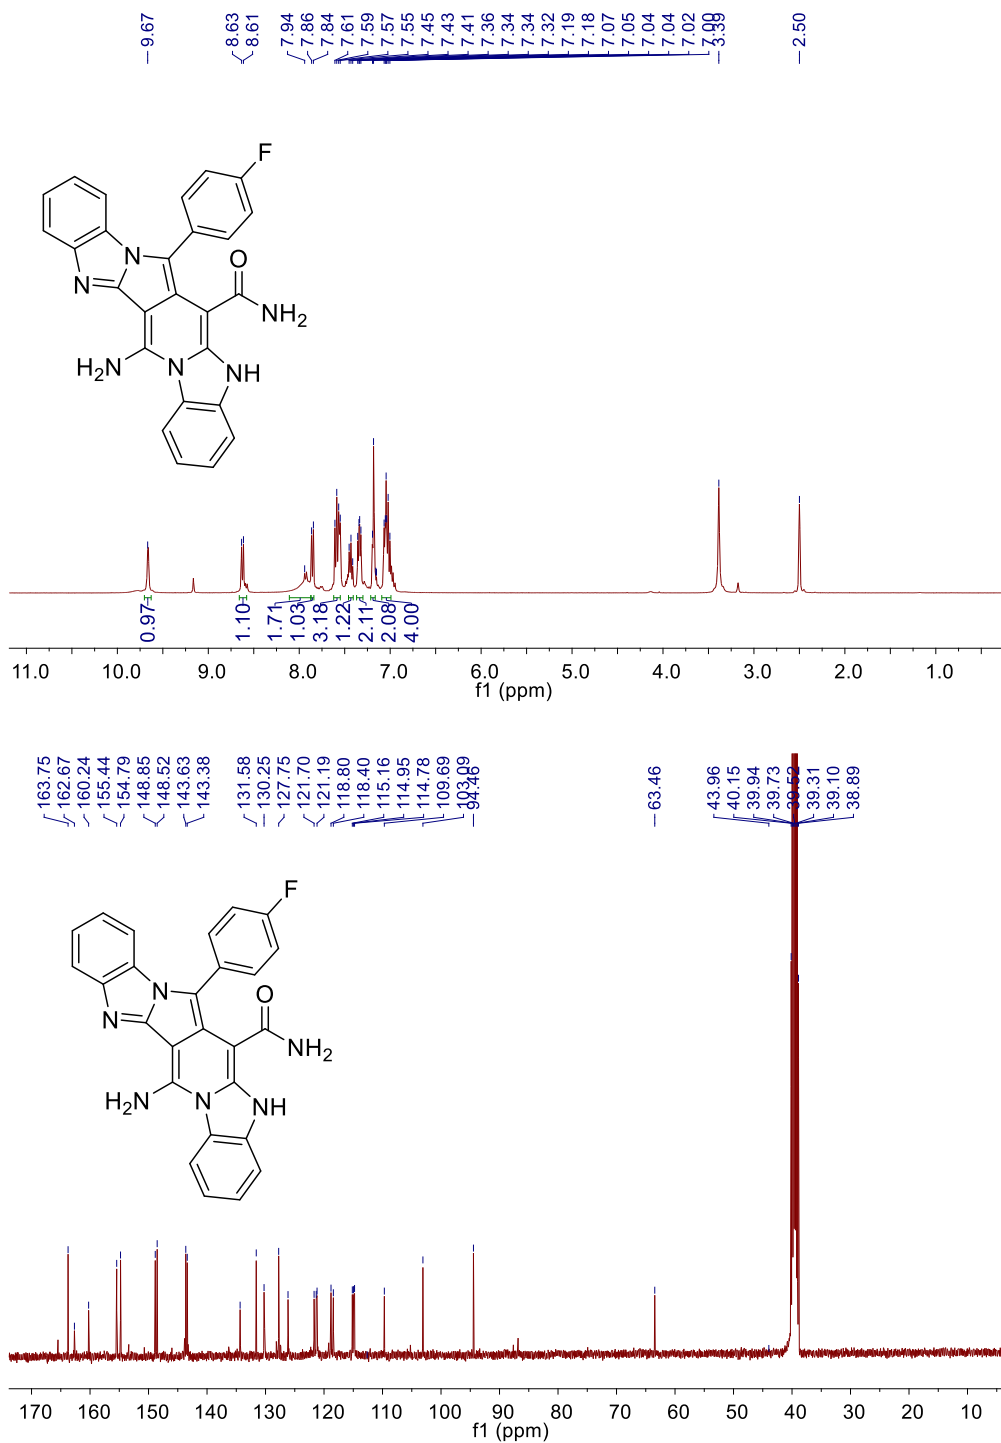

**Fig. 17** <sup>1</sup>H, <sup>13</sup>C spectrum of 6-amino-14-(4-fluorophenyl)-12H-benzo[4',5']imidazo[1',2':1,5]pyrrolo[3,4-d]benzo[4,5]imidazo[1,2-a]pyridine-13-carboxamide **S<sub>2a</sub>**

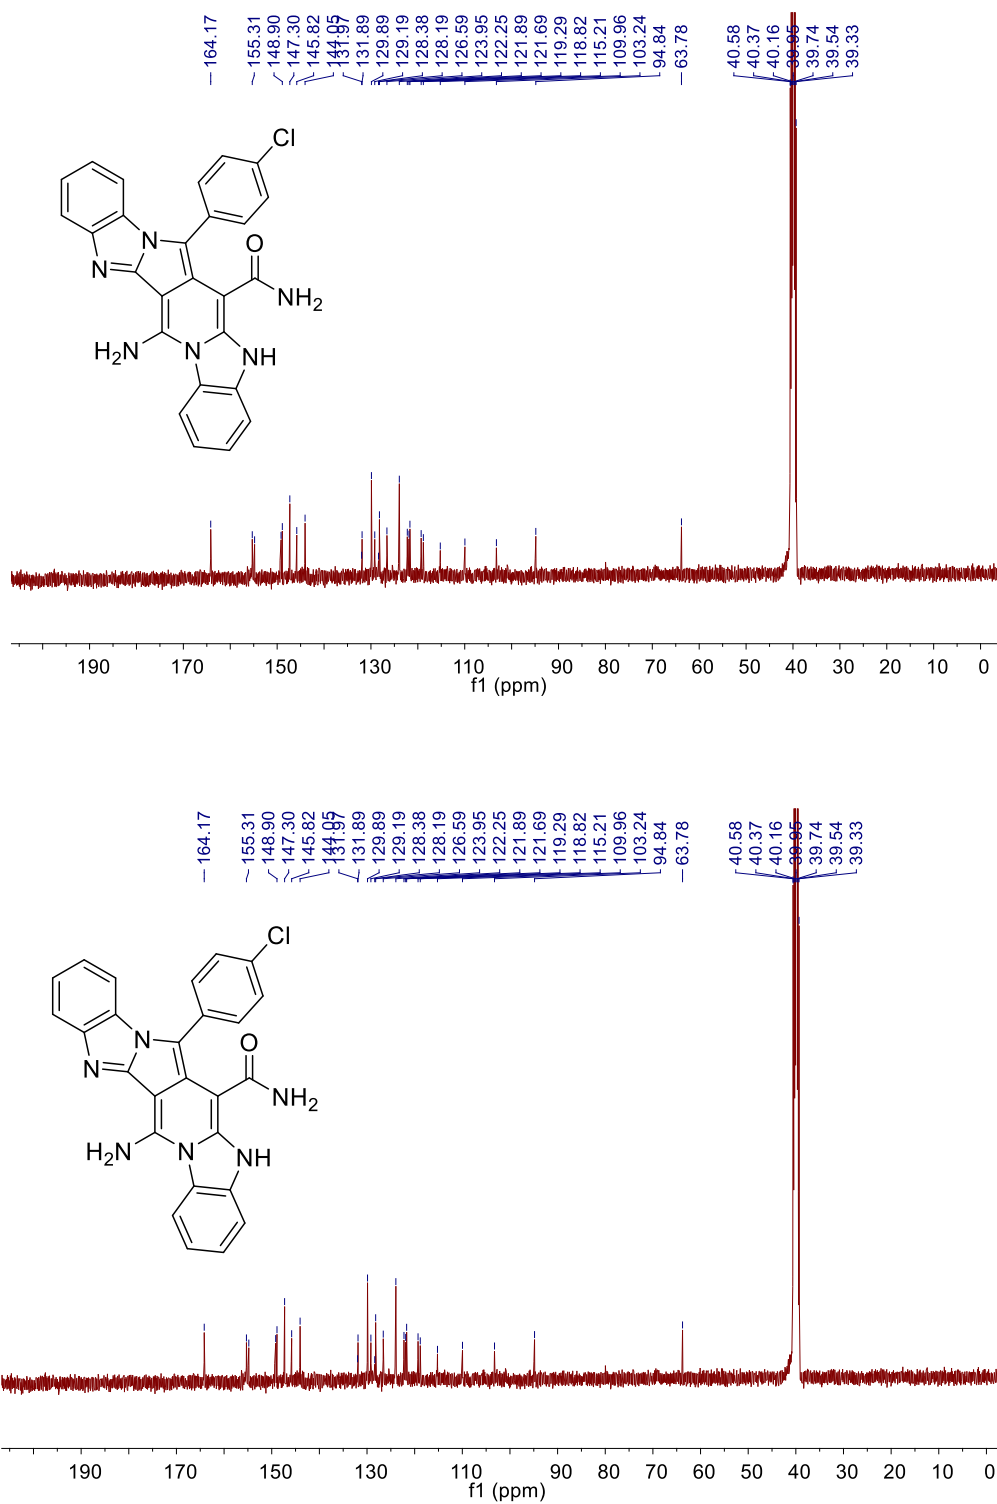

**Fig. 18**  $^1\text{H}$ ,  $^{13}\text{C}$  spectrum of 6-amino-14-(4-chlorophenyl)-12H-benzo[4,5']imidazo[1',2':1,5]pyrrolo[3,4-d]benzo[4,5]imidazo[1,2-a]pyridine-13-carboxamide **S<sub>2e</sub>**

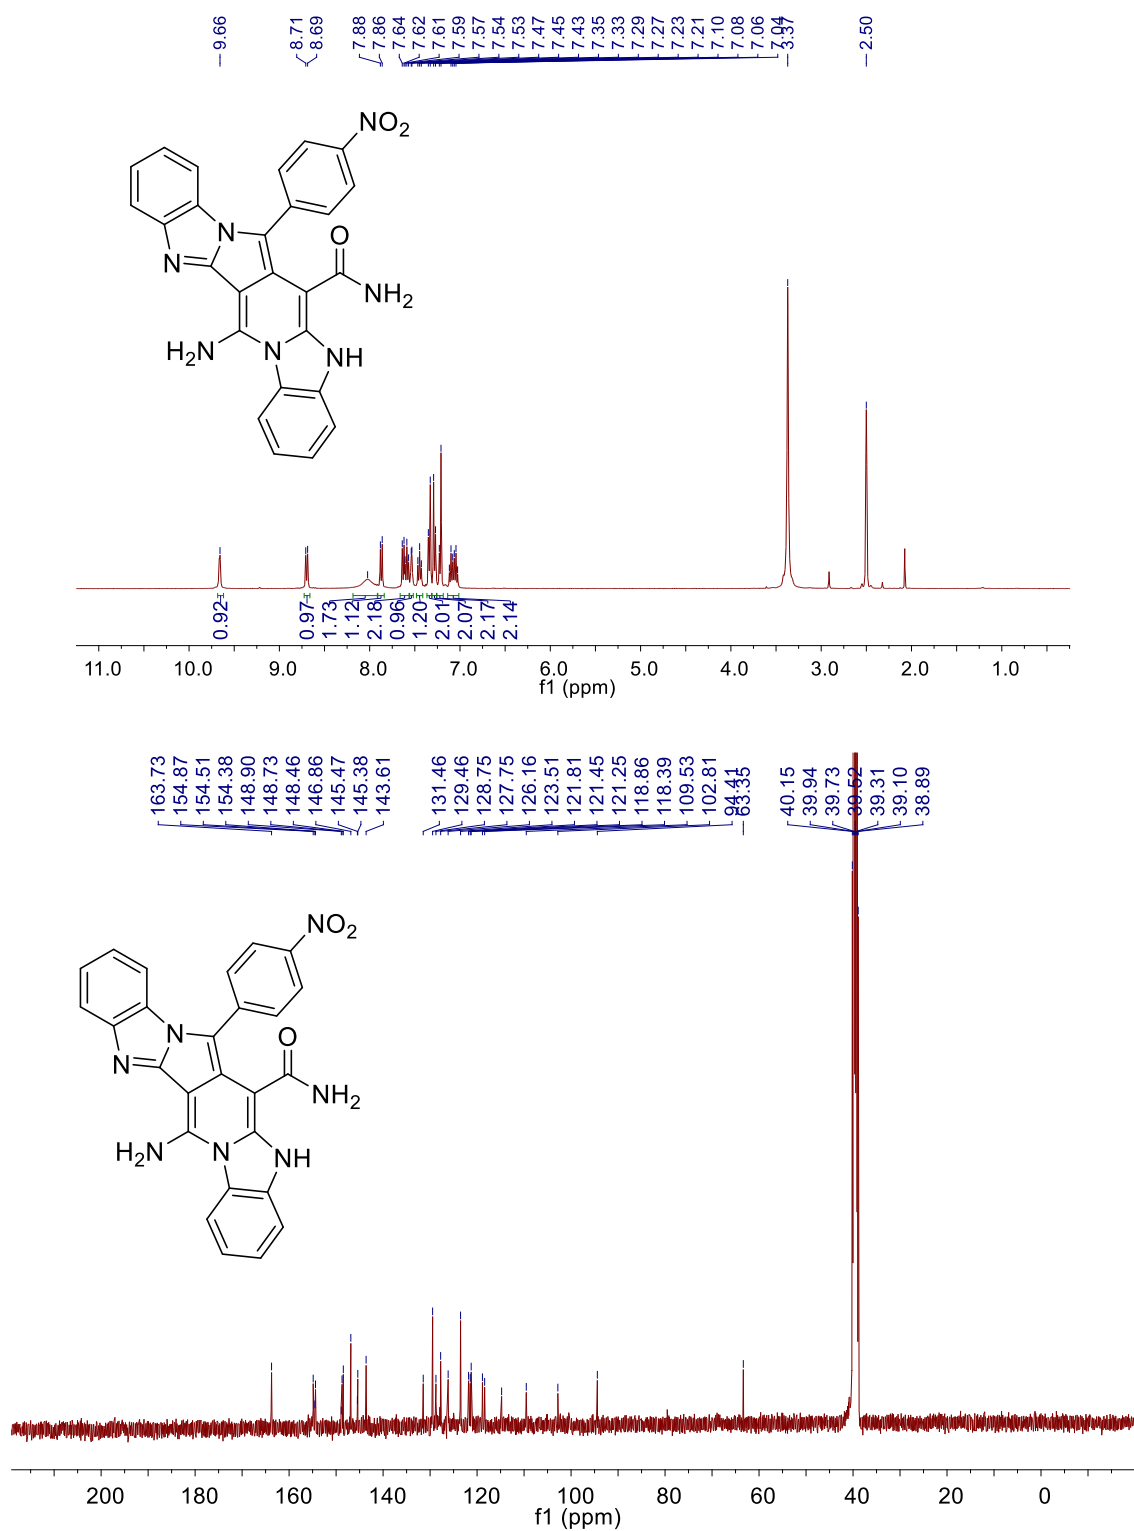

**Fig. 19** <sup>1</sup>H, <sup>13</sup>C spectrum of 6-amino-14-(4-nitrophenyl)-12H-benzo[4',5']imidazo[1',2':1,5]pyrrolo[3,4-d]benzo[4,5]imidazo[1,2-a]pyridine-13-carboxamide **S<sub>2f</sub>**

**Synthetic procedure for the synthesis of 2-amino-3-(1H-benzo[d]imidazol-2-yl)-10a-phenyl-10aH-benzo[d]furo[3',2':4,5] pyrrolo[1,2-a]imidazole-4-carboxamide **S<sub>3</sub>****

Initially, the reaction was carried out between 4-methyl phenylglyoxal (1 mmol) (**A<sub>2</sub>**), benzimidazole acetonitrile (2 mmol) (**B<sub>1</sub>**) in the presence of NaO<sup>t</sup>Bu catalyst at room temperature in open atmosphere in the round bottom flask. The progress of the reaction was monitored by TLC for completion of the reaction. The reaction mixture turned to pale yellow precipitate in 1h and the solid washed with suitable EtOH solvent 5x3 mL for removal of unreacted starting material. Finally observed pale yellow solid with good yield of 85% **S<sub>3a</sub>**. The product was confirmed by <sup>1</sup>H NMR, <sup>13</sup>C NMR, FTIR and HRMS spectra.

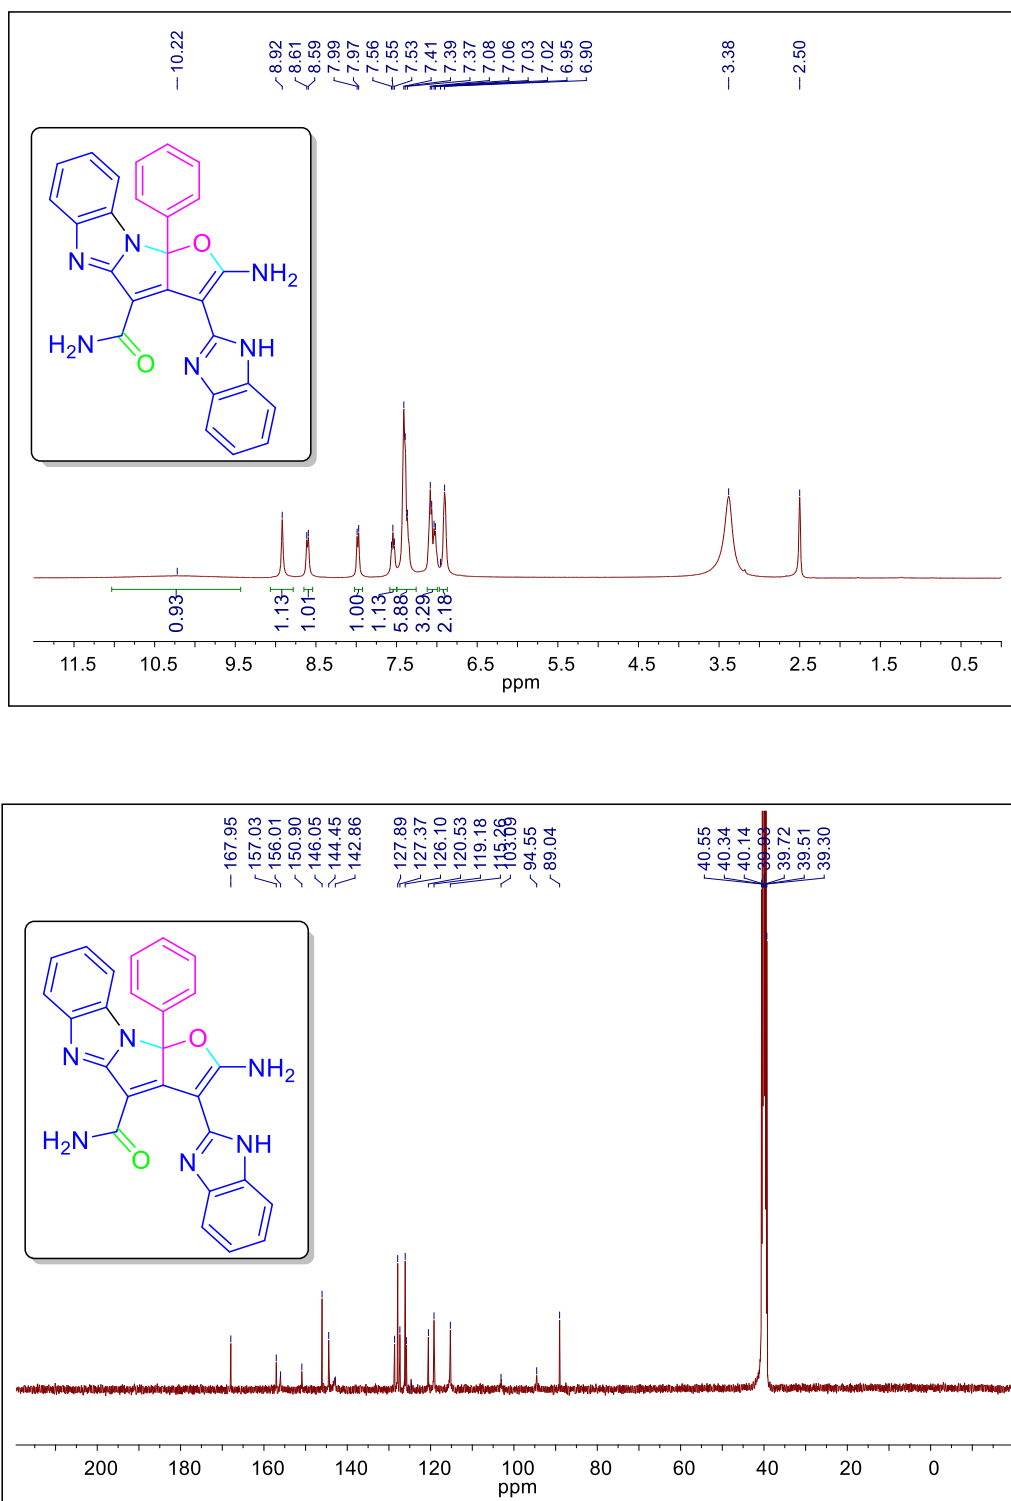

**Fig. 20** <sup>1</sup>H, <sup>13</sup>C spectrum of 2-amino-3-(1H-benzo[d]imidazol-2-yl)-10a-phenyl-10aH-benzo[d]furo[3',2':4,5]pyrrolo [1,2-a]imidazole-4-carboxamide **S<sub>3a</sub>**

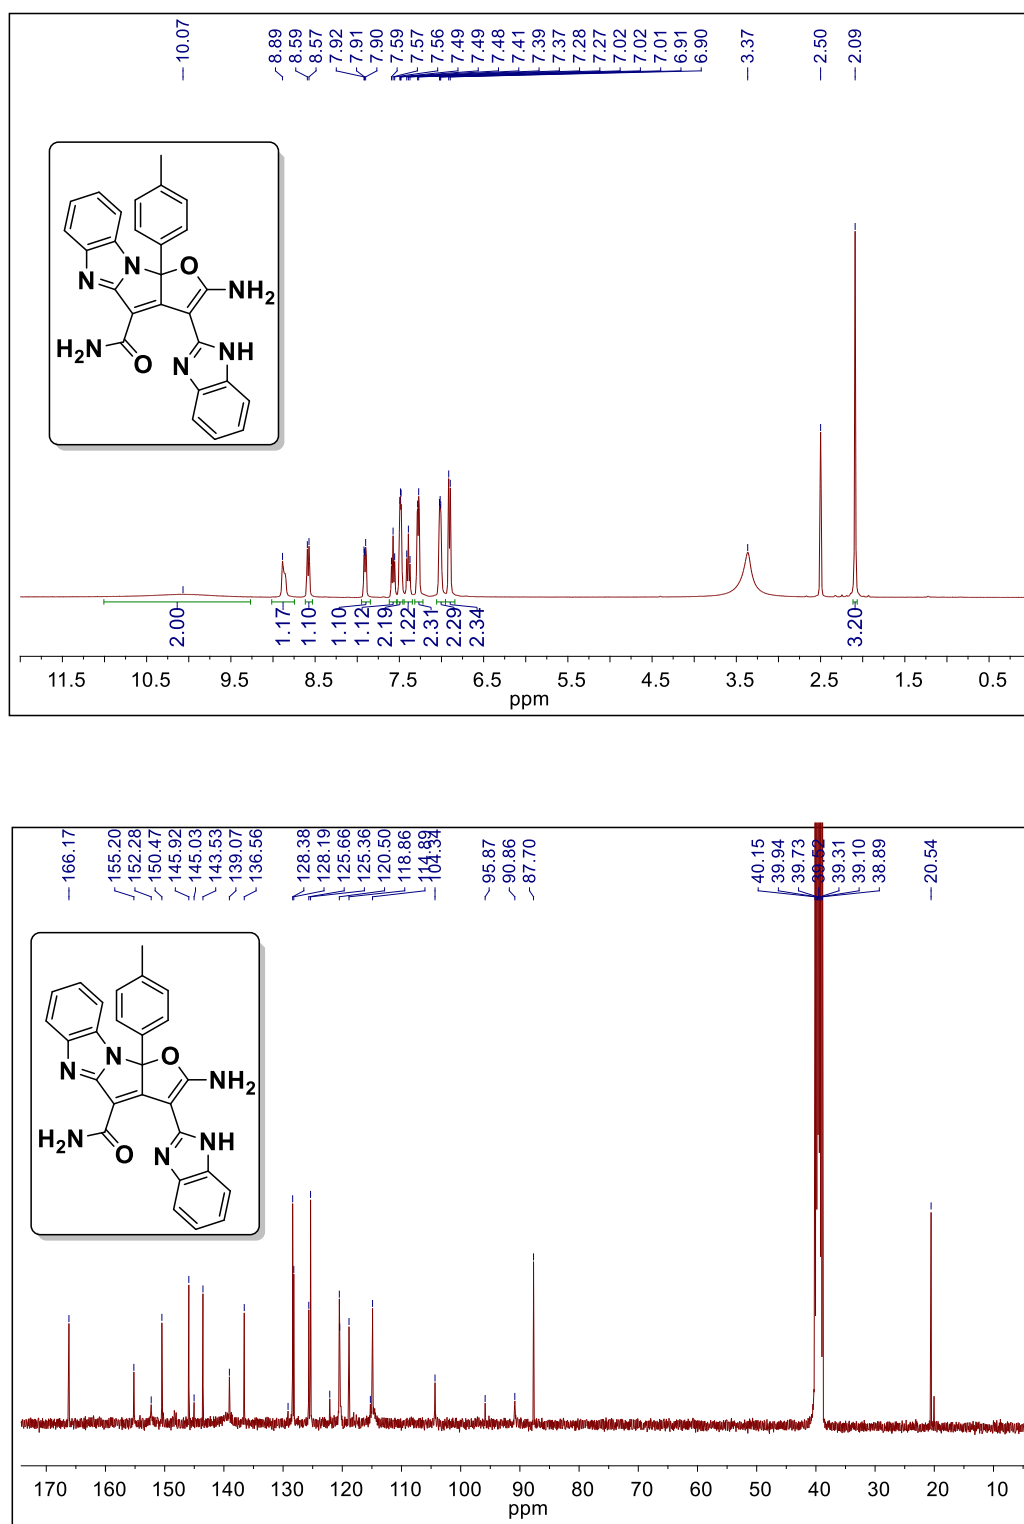

**Fig. 21** <sup>1</sup>H, <sup>13</sup>C spectrum of 2-amino-3-(1H-benzo[d]imidazol-2-yl)-10a-(p-tolyl)-10aH-benzo[d]furo[3',2':4,5] pyrrolo [1,2-a]imidazole-4-carboxamide **S<sub>3b</sub>**



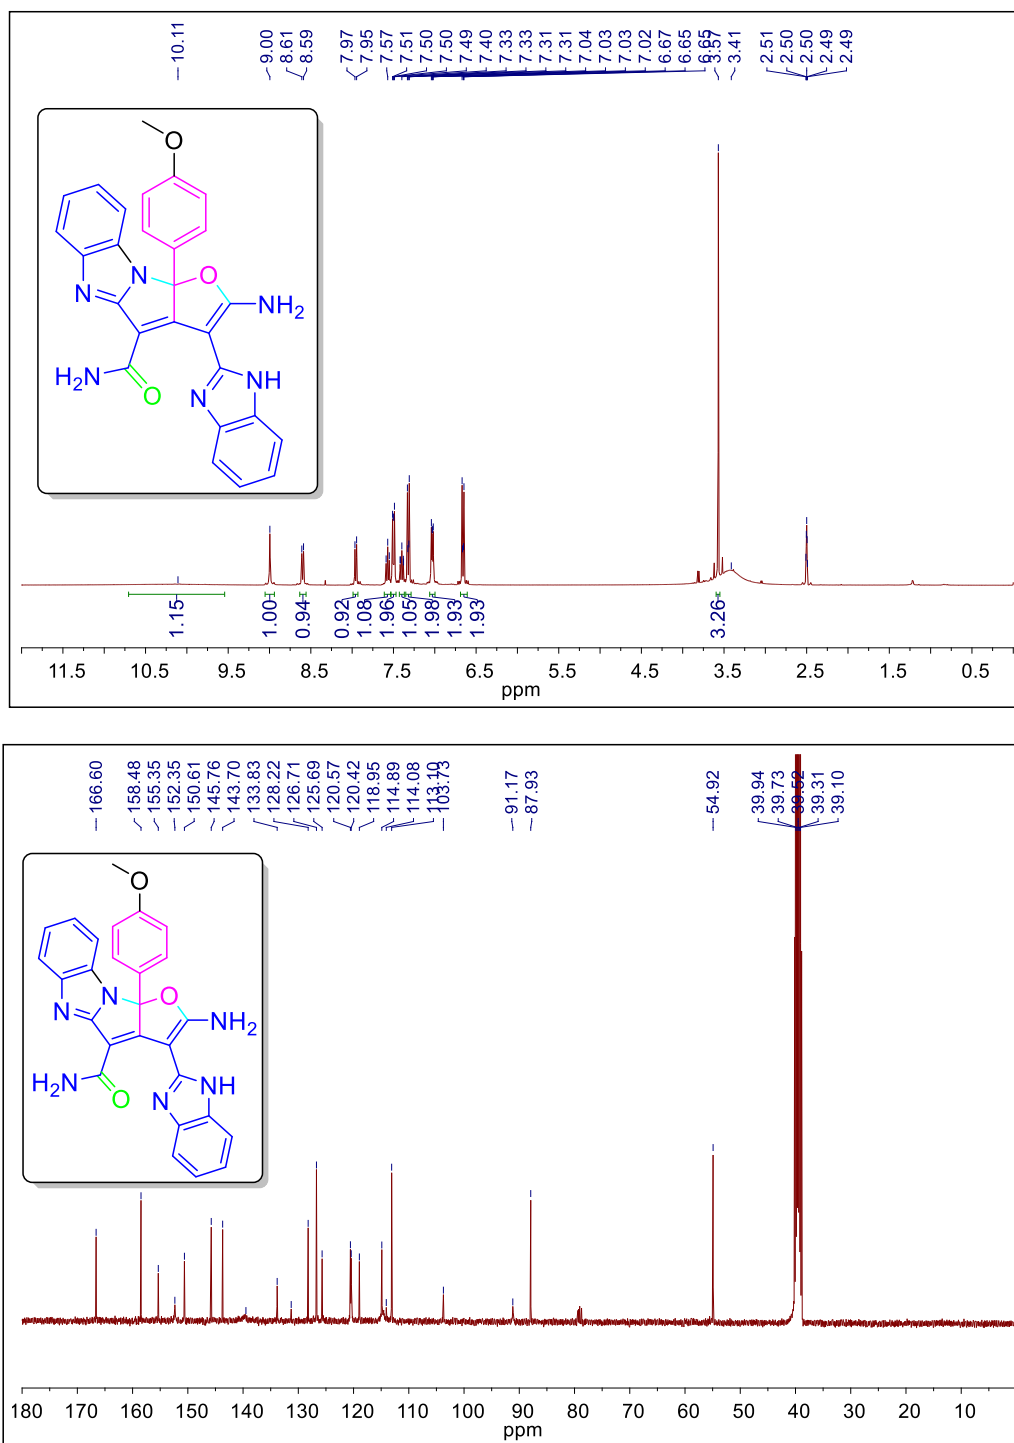

**Fig. 22** <sup>1</sup>H, <sup>13</sup>C spectrum of 2-amino-3-(1H-benzo[d]imidazol-2-yl)-10a-(4-methoxyphenyl)-10aH-benzo[d]furo [3',2':4,5]pyrrolo[1,2-a]imidazole-4-carboxamide **3c**

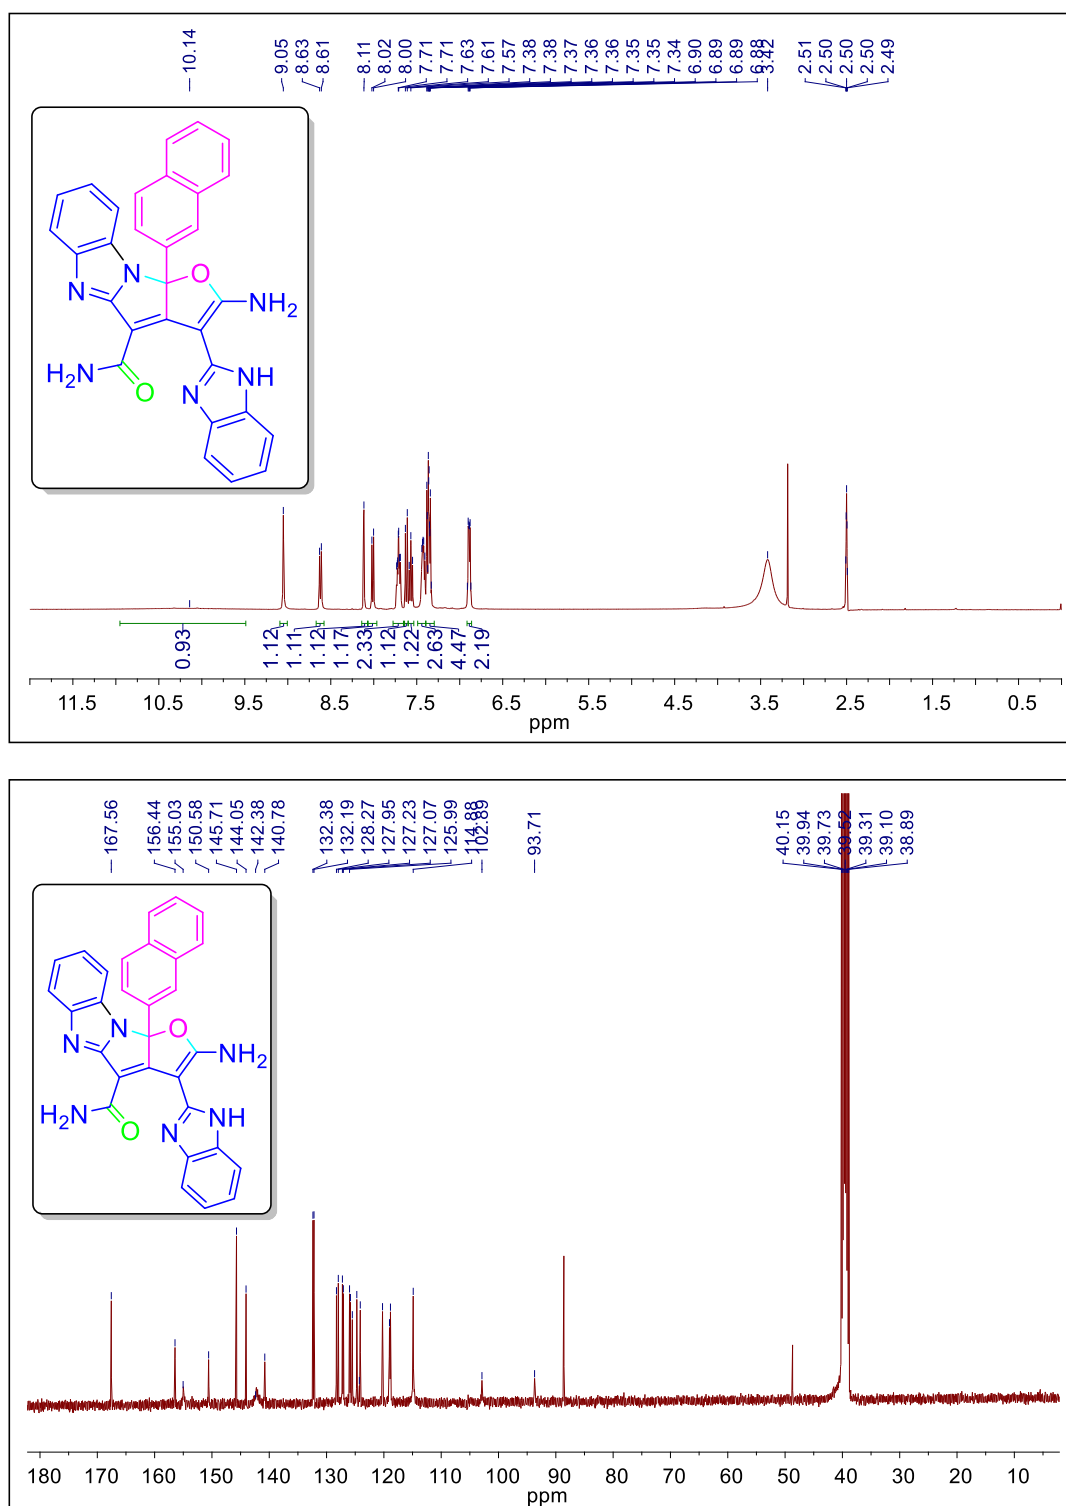

**Fig. 23** <sup>1</sup>H, <sup>13</sup>C spectrum of 2-amino-3-(1H-benzo[d]imidazol-2-yl)-10a-(naphthalen-2-yl)-10aH-benzo[d]furo [3',2':4,5] pyrrolo[1,2-a]imidazole-4-carboxamide **S3a**

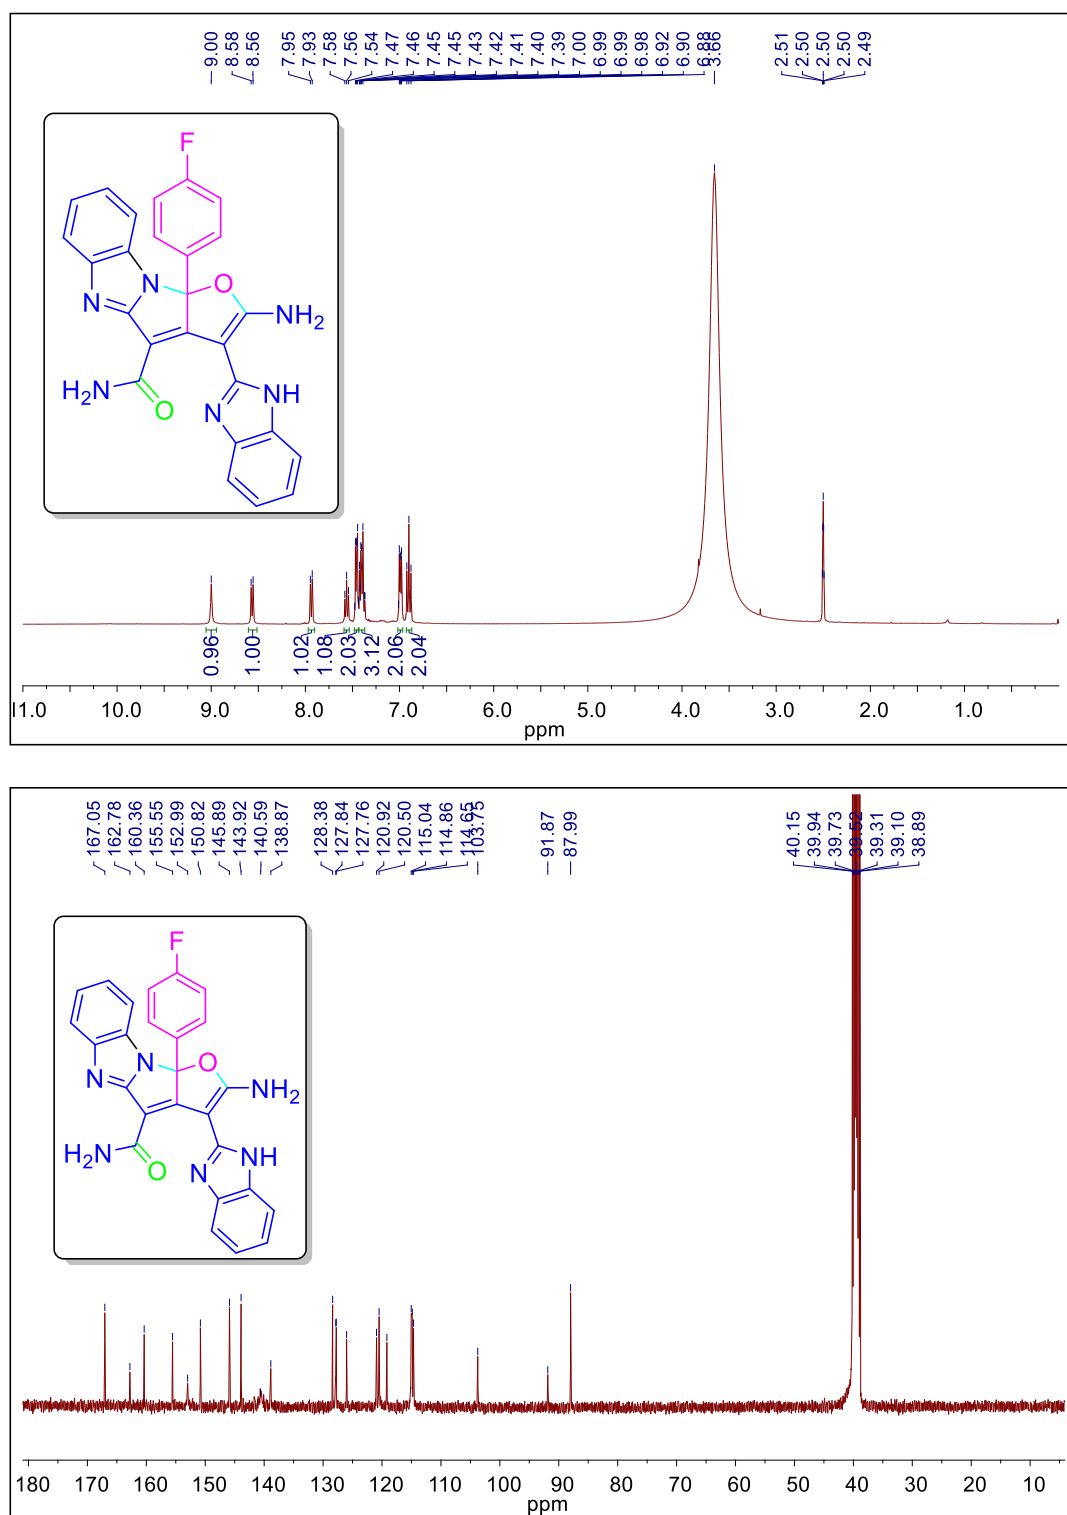

**Fig. 24** <sup>1</sup>H, <sup>13</sup>C spectrum of 2-amino-3-(1H-benzo[d]imidazol-2-yl)-10a-(4-fluorophenyl)-10aH-benzo[d]furo[3',2':4,5] pyrrolo[1,2-a]imidazole-4-carboxamide **S<sub>3e</sub>**

**Synthetic procedure for the synthesis of 5-amino-4-(benzo[d]thiazol-2-yl)-6a-methyl-2-phenyl-3a,6a-dihydrofuro[2,3-b]furan-3-carbonitrile **S<sub>4</sub>****

Initially, a three component reaction was performed between methylglyoxal (**A<sub>13</sub>**), benzoyl acetonitrile (**C<sub>3</sub>**) and benzothiazole acetonitrile (**B<sub>2</sub>**) in EtOH/H<sub>2</sub>O in the presence of DABCO at room temperature. The reaction was monitored by TLC for completion of the reaction. The reaction mixture turned to white precipitate and showed single spot in TLC. Therefore, the precipitate was filtered and washed with 5x3 mL of CH<sub>3</sub>CN solution observed white solid yield of 90% **S<sub>4a</sub>**. The entire product formed was characterized by FTIR, <sup>1</sup>H NMR, <sup>13</sup>C NMR, and HRMS spectra.

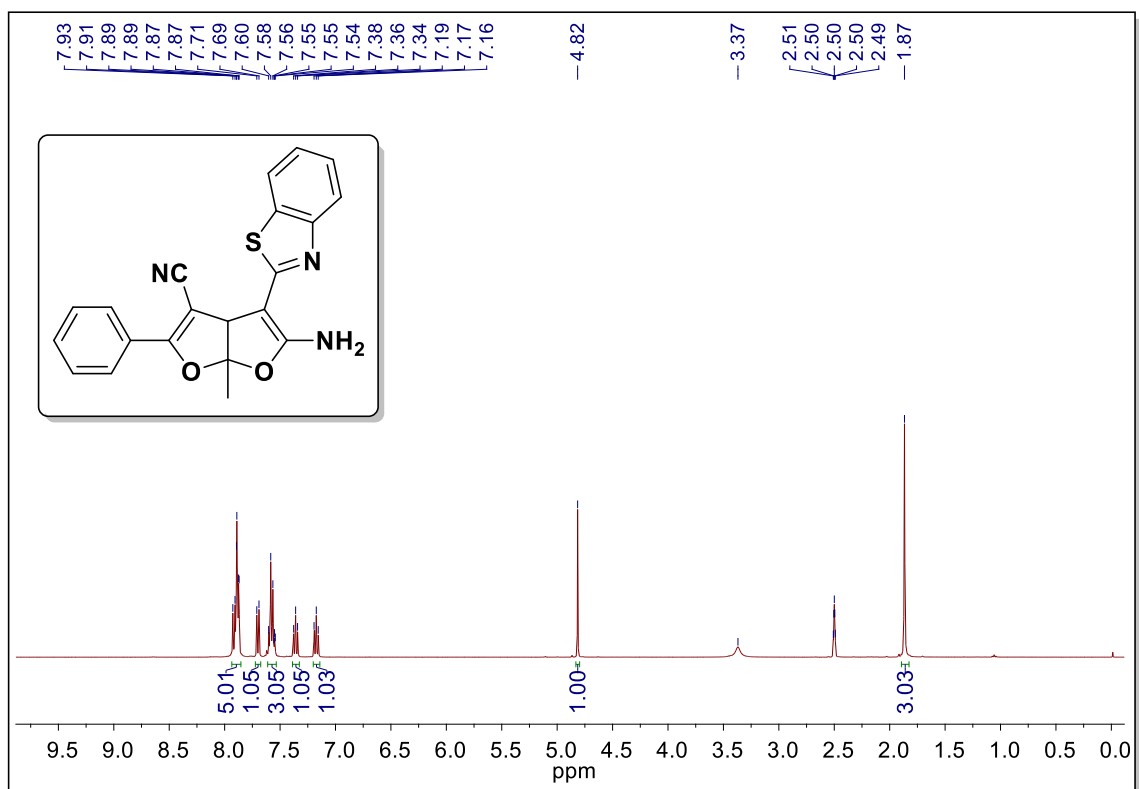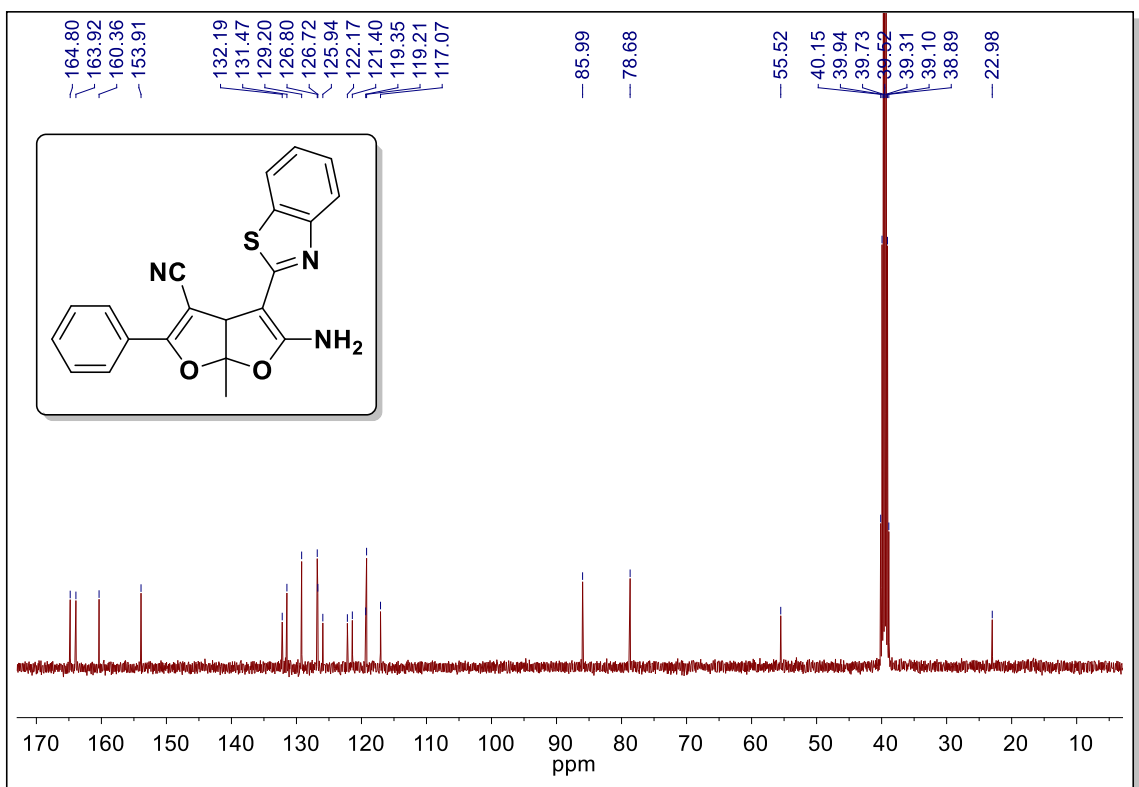

**Fig. 25** <sup>1</sup>H, <sup>13</sup>C spectrum of 5-amino-4-(benzo[d]thiazol-2-yl)-6a-methyl-2-phenyl-3a,6a-dihydrofuro[2,3-b]furan-3-carbonitrile **S**<sub>4a</sub>

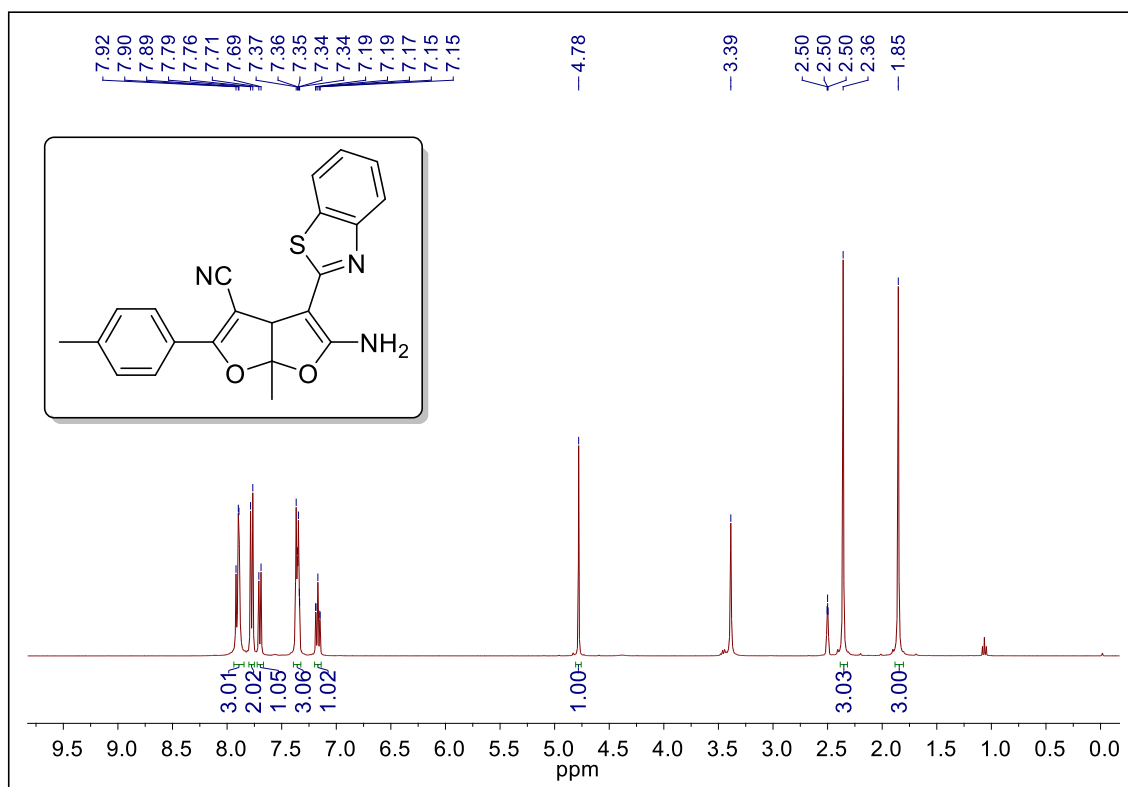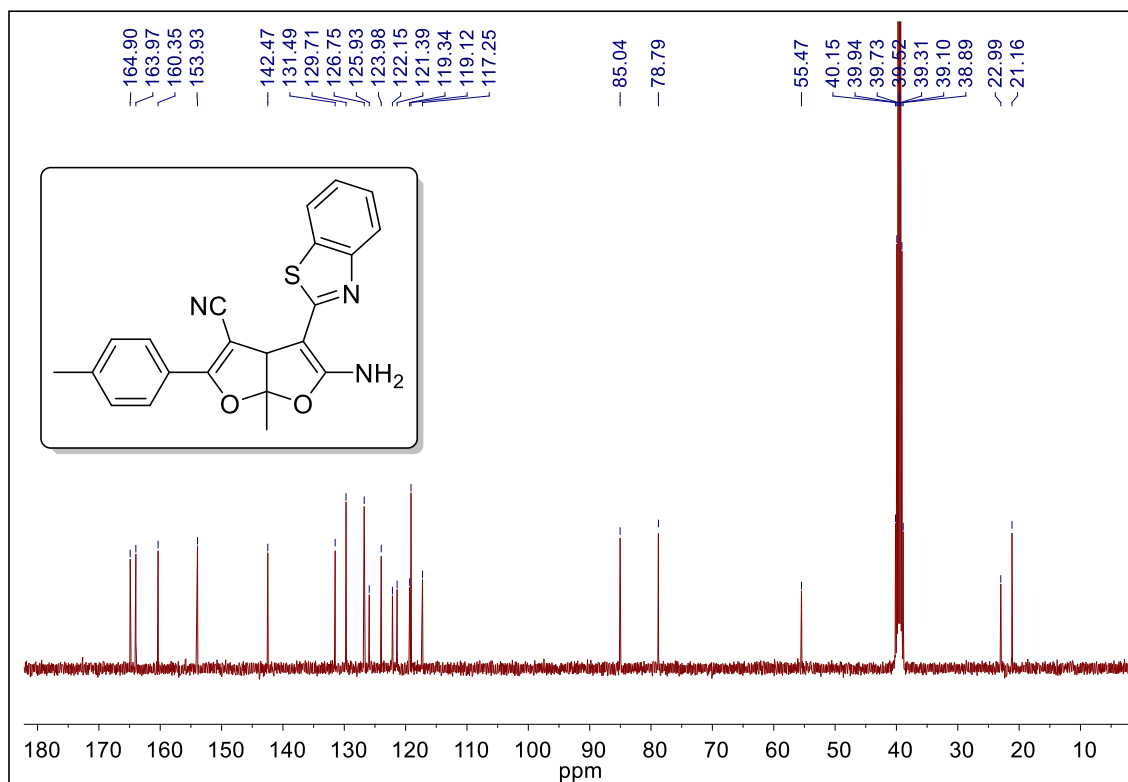

**Fig. 26** <sup>1</sup>H, <sup>13</sup>C spectrum of 5-amino-4-(benzo[d]thiazol-2-yl)-6a-methyl-2-(p-tolyl)-3a,6a-dihydrofuro[2,3-b]furan-3-carbonitrile **S<sub>4b</sub>**

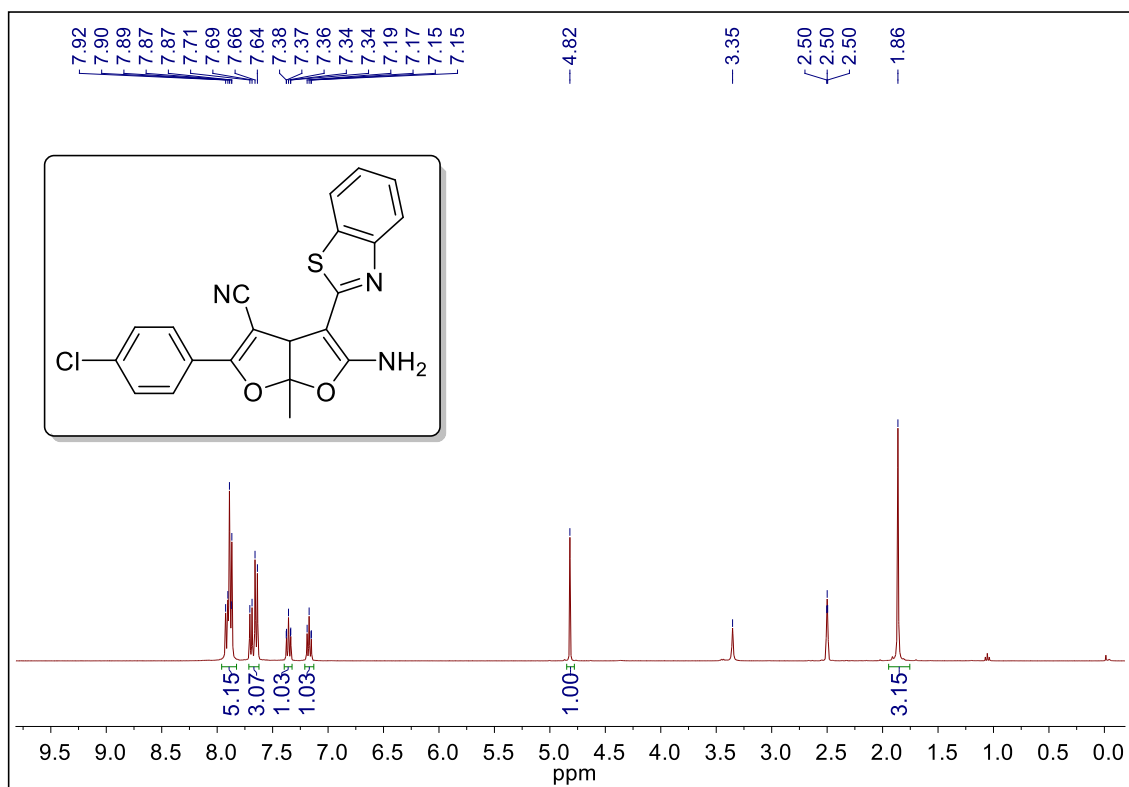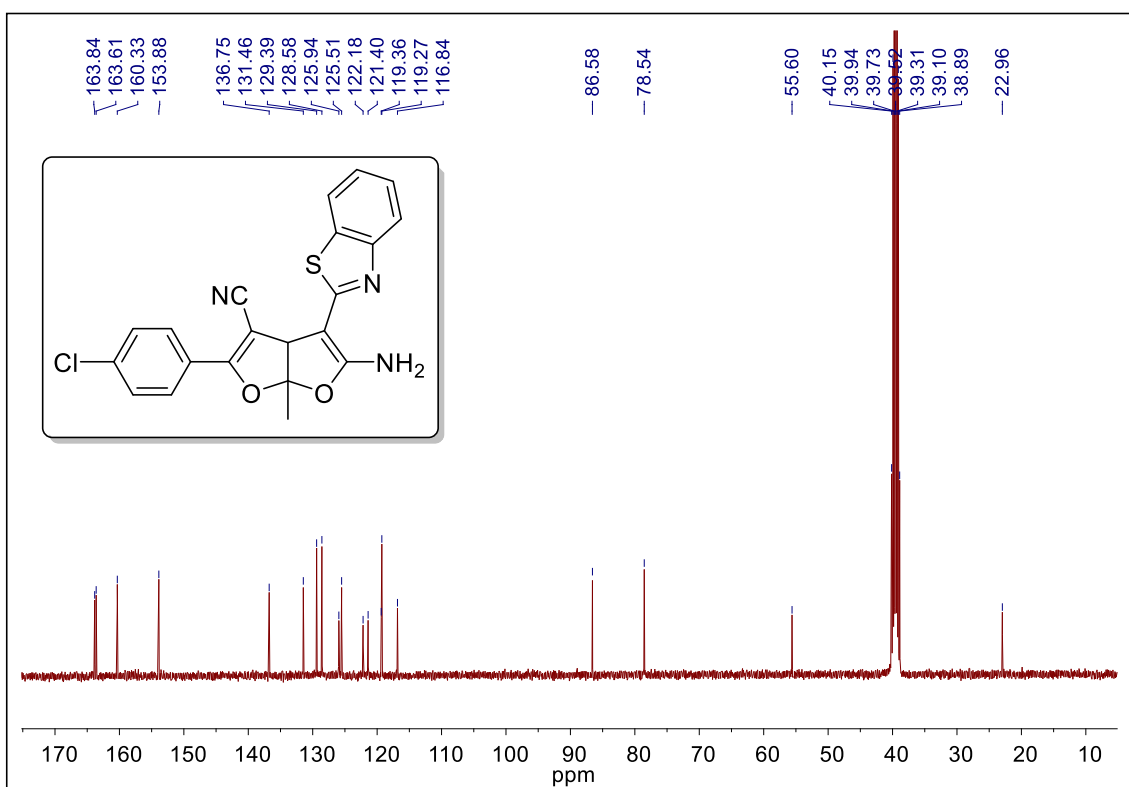

**Fig. 27** <sup>1</sup>H, <sup>13</sup>C spectrum of 5-amino-4-(benzo[d]thiazol-2-yl)-2-(4-chlorophenyl)-6a-methyl-3a,6a-dihydrofuro[2,3-b] furan-3-carbonitrile **S<sub>4c</sub>**

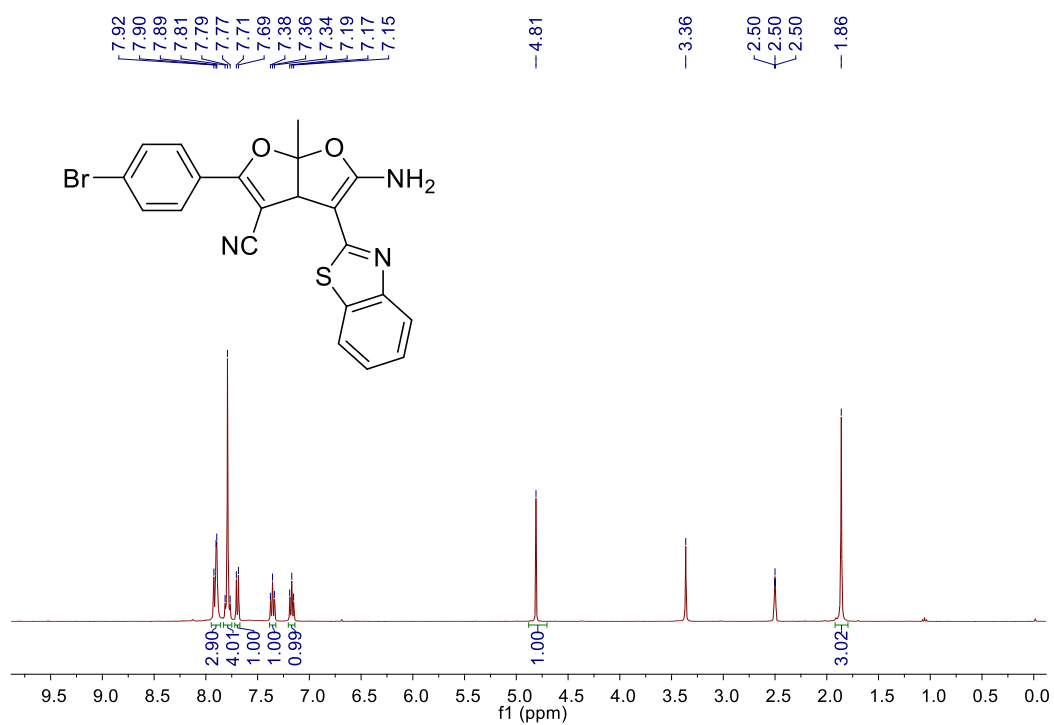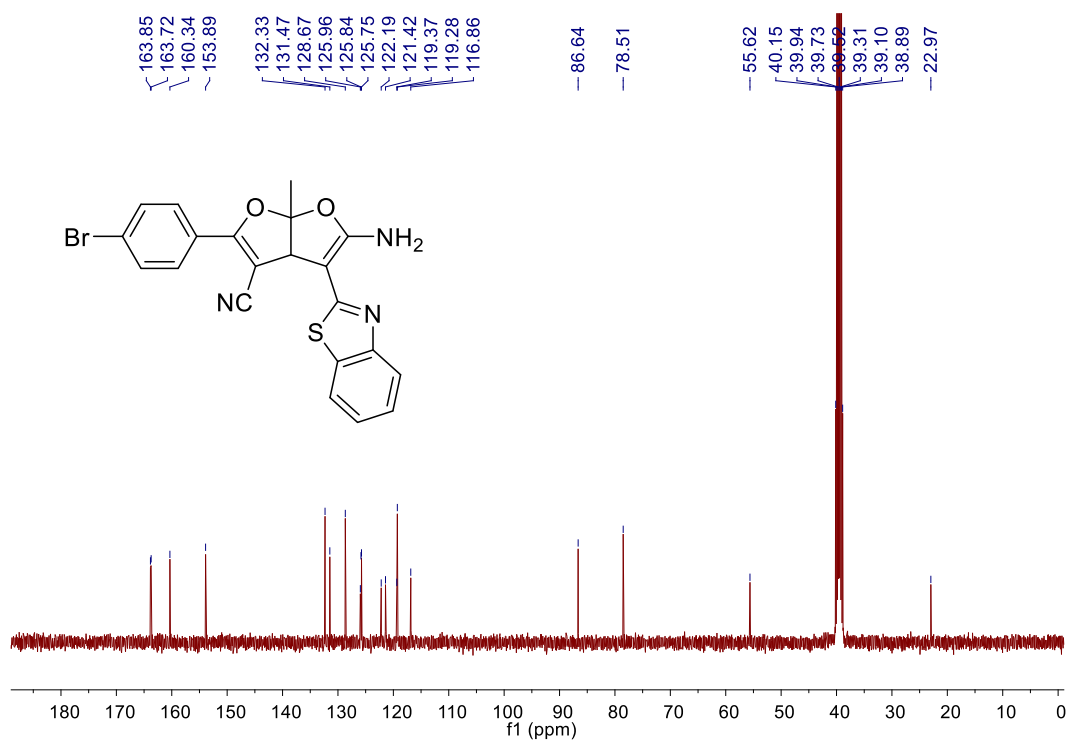

**Fig. 28** <sup>1</sup>H, <sup>13</sup>C spectrum of 5-amino-4-(benzo[d]thiazol-2-yl)-2-(4-bromophenyl)-6a-methyl-3a,6a-dihydrofuro[2,3-b]furan-3-carbonitrile **S<sub>4d</sub>**



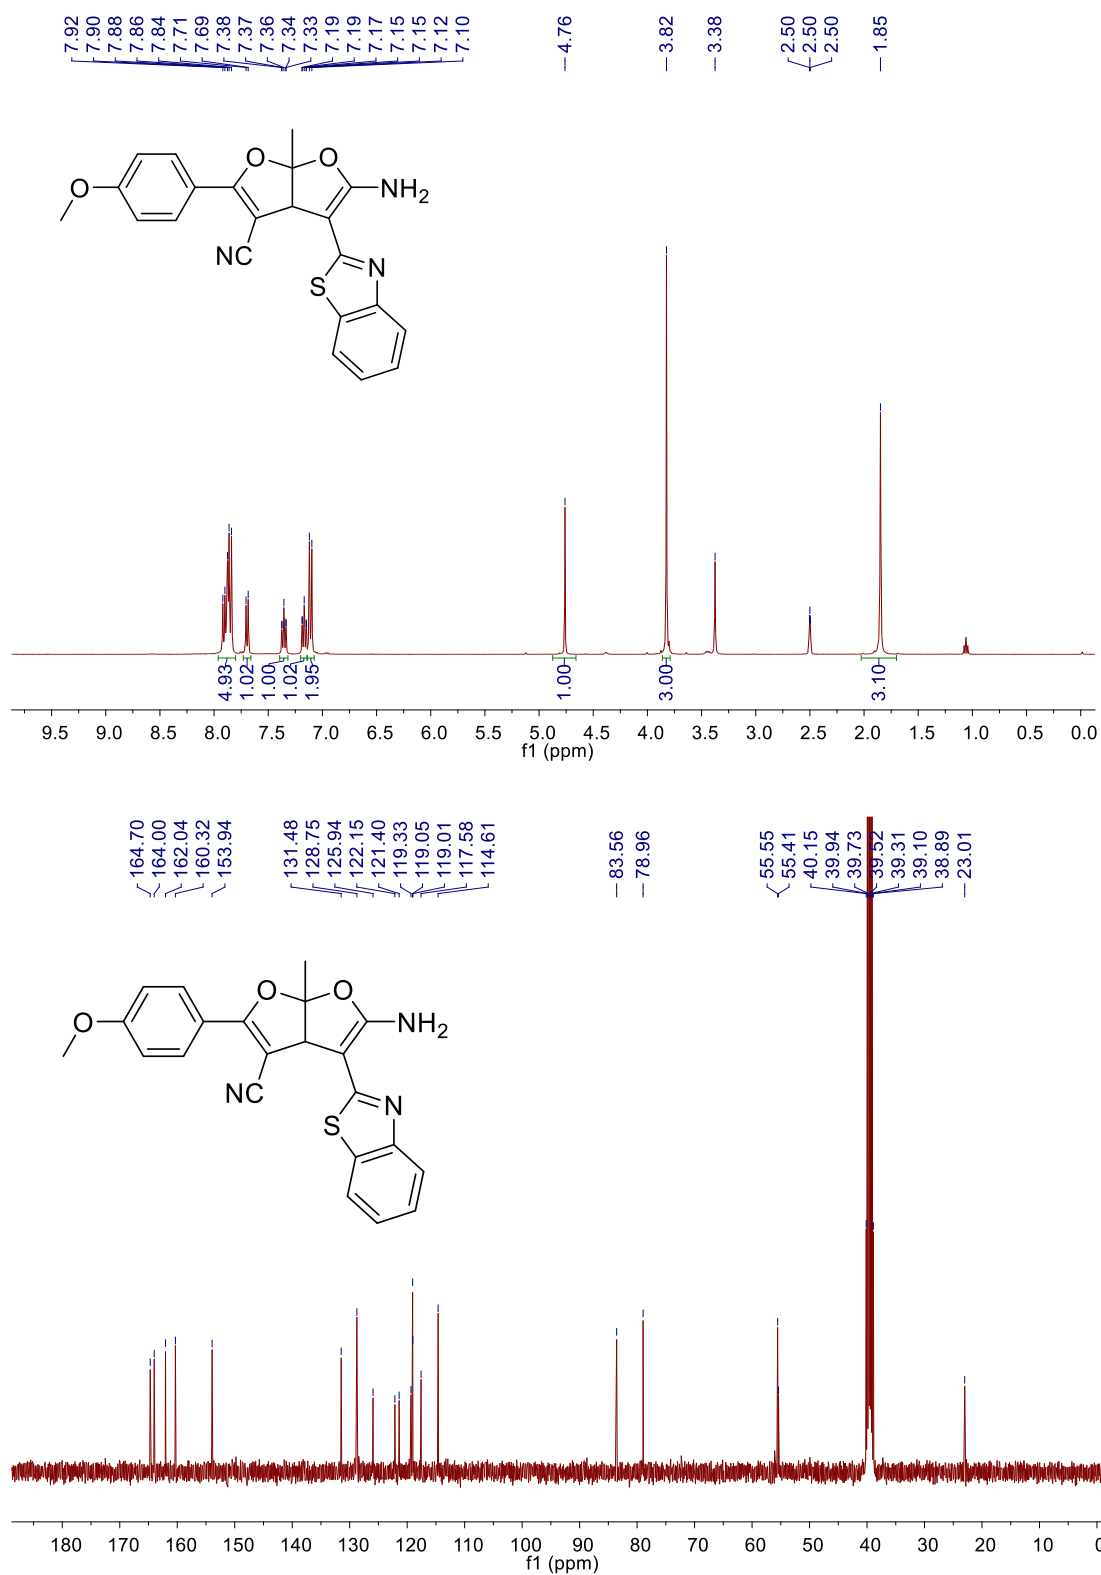

**Fig. 29** <sup>1</sup>H, <sup>13</sup>C spectrum of 5-amino-4-(benzo[d]thiazol-2-yl)-2-(4-methoxyphenyl)-6a-methyl-3a,6a-dihydrofuro[2,3-b]furan-3-carbonitrile **S<sub>4e</sub>**

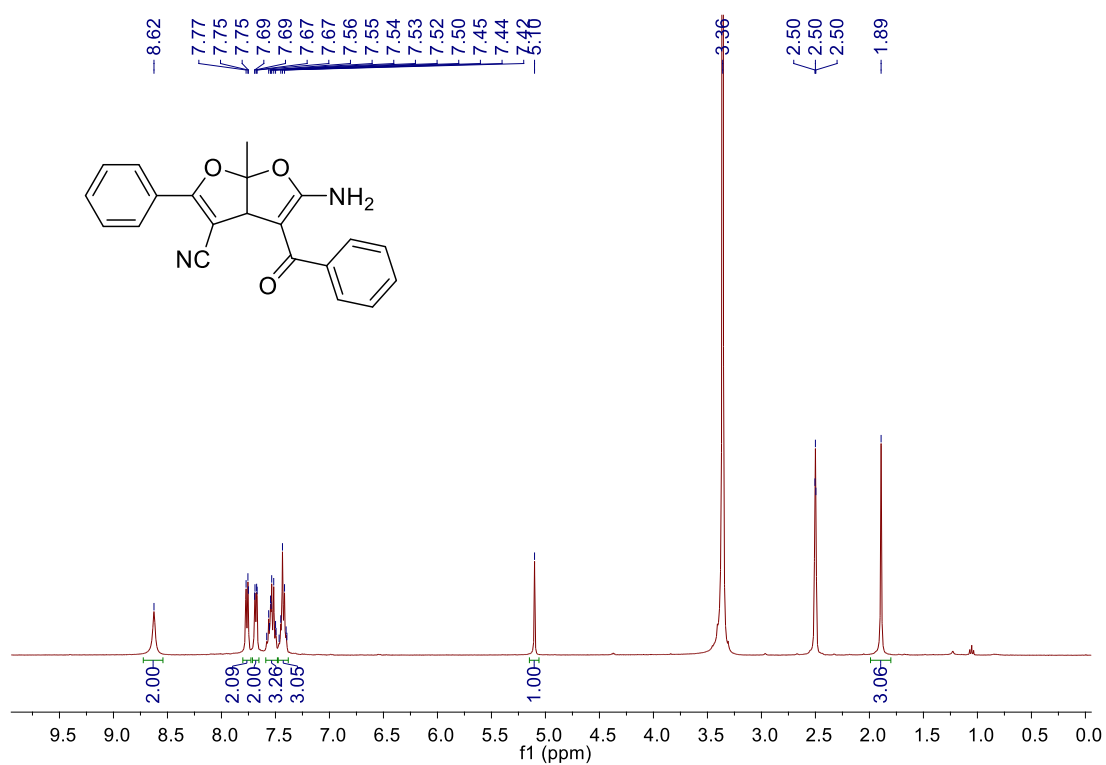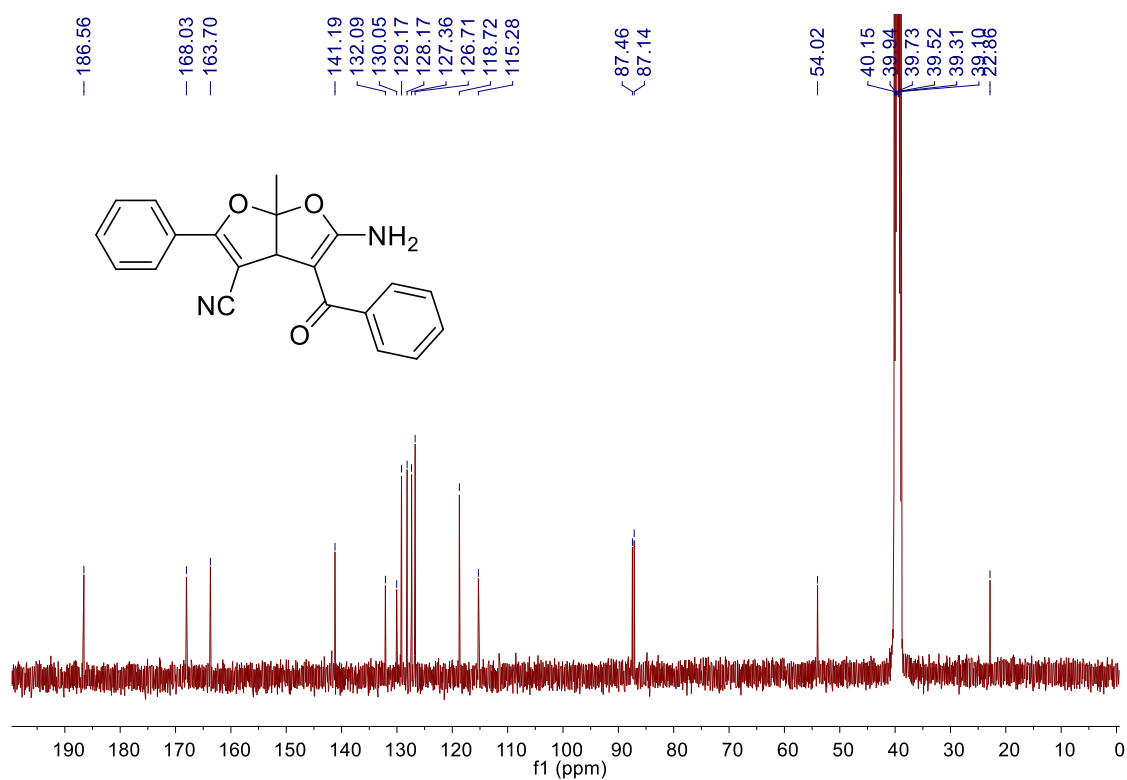

**Fig. 30** <sup>1</sup>H, <sup>13</sup>C spectrum of 5-amino-4-benzoyl-6a-methyl-2-phenyl-3a,6a-dihydrofuro[2,3-b]furan-3-carbonitrile **54f**

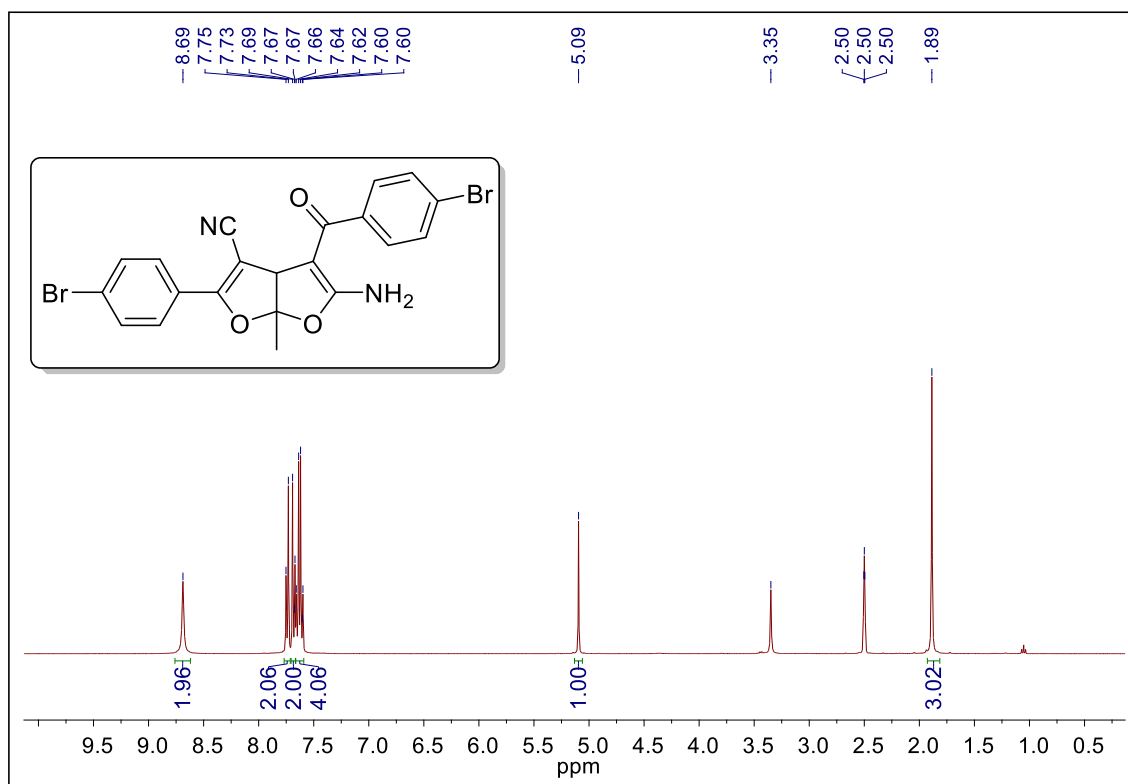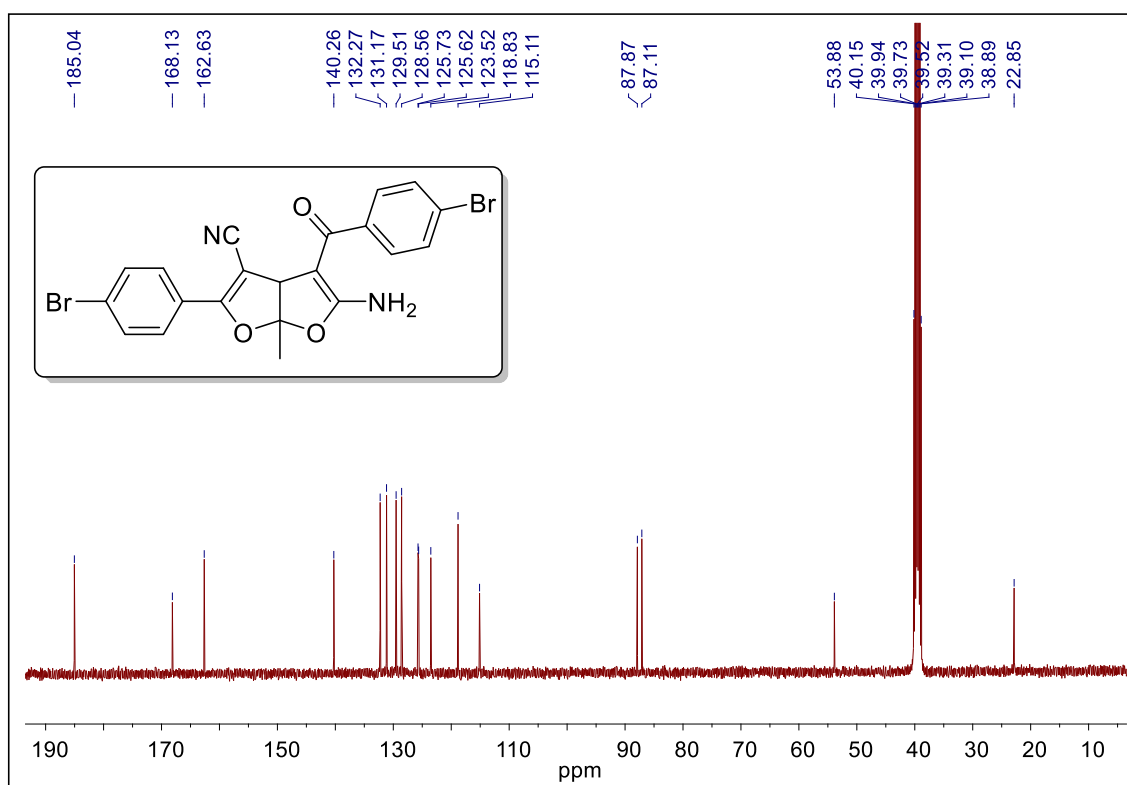

**Fig. 31** <sup>1</sup>H, <sup>13</sup>C spectrum of 5-amino-4-(4-bromobenzoyl)-2-(4-bromophenyl)-6a-methyl-3a,6a-dihydrofuro[2,3-b]furan-3-carbonitrile **S<sub>4g</sub>**

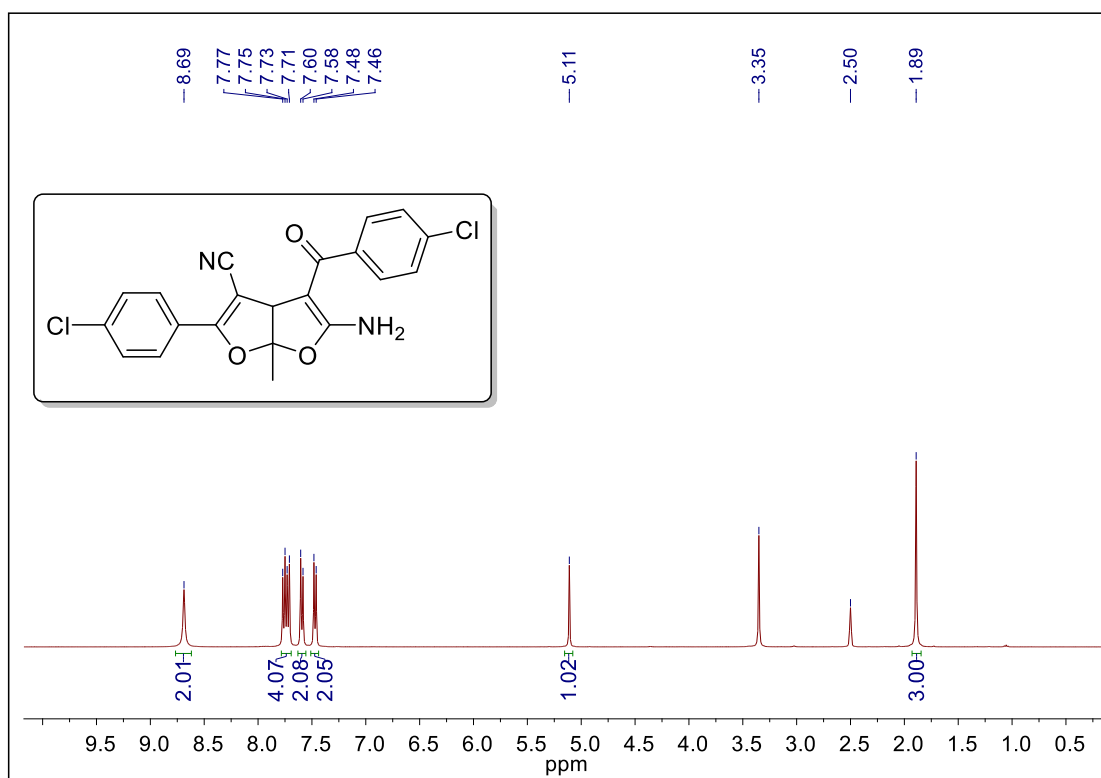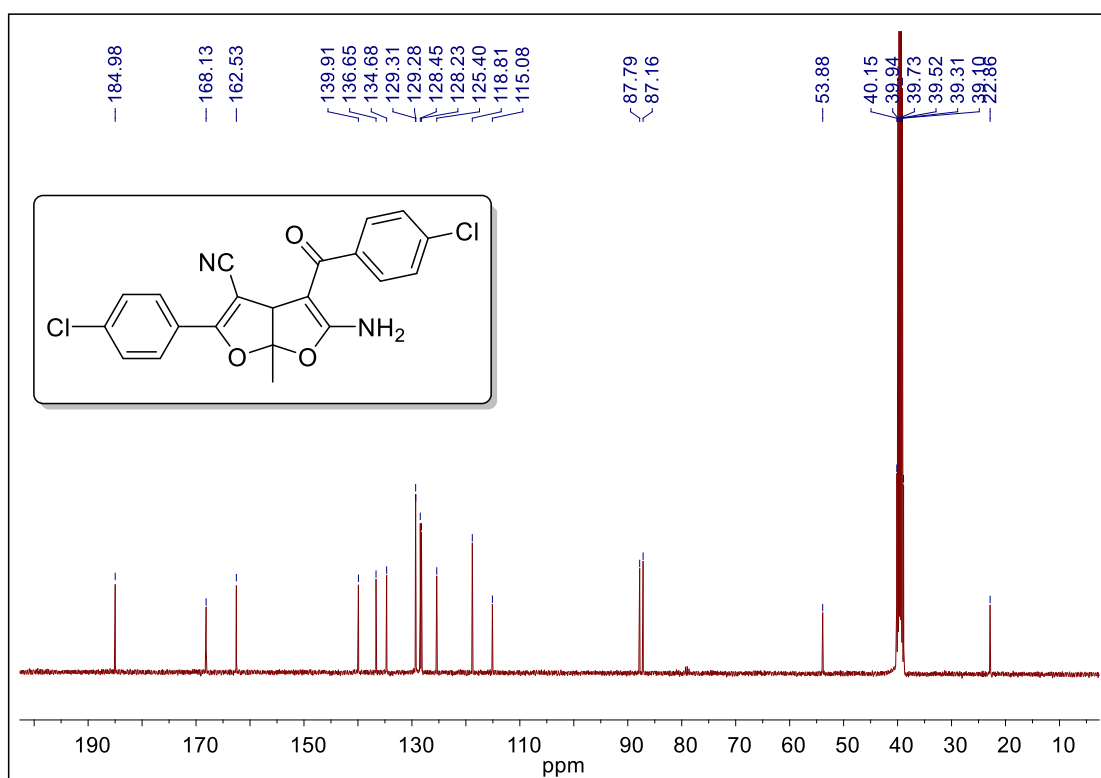

**Fig. 32** <sup>1</sup>H, <sup>13</sup>C spectrum of 5-amino-4-(4-chlorobenzoyl)-2-(4-chlorophenyl)-6a-methyl-3a,6a-dihydrofuro[2,3-b]furan-3-carbonitrile **S<sub>4h</sub>**

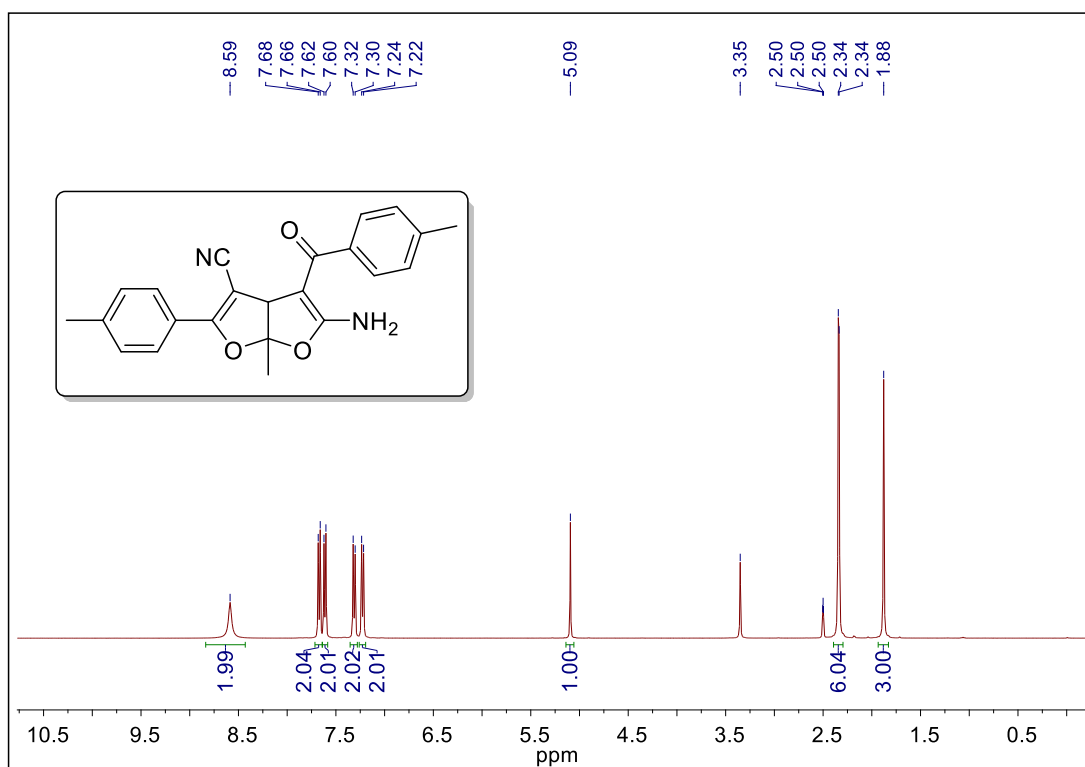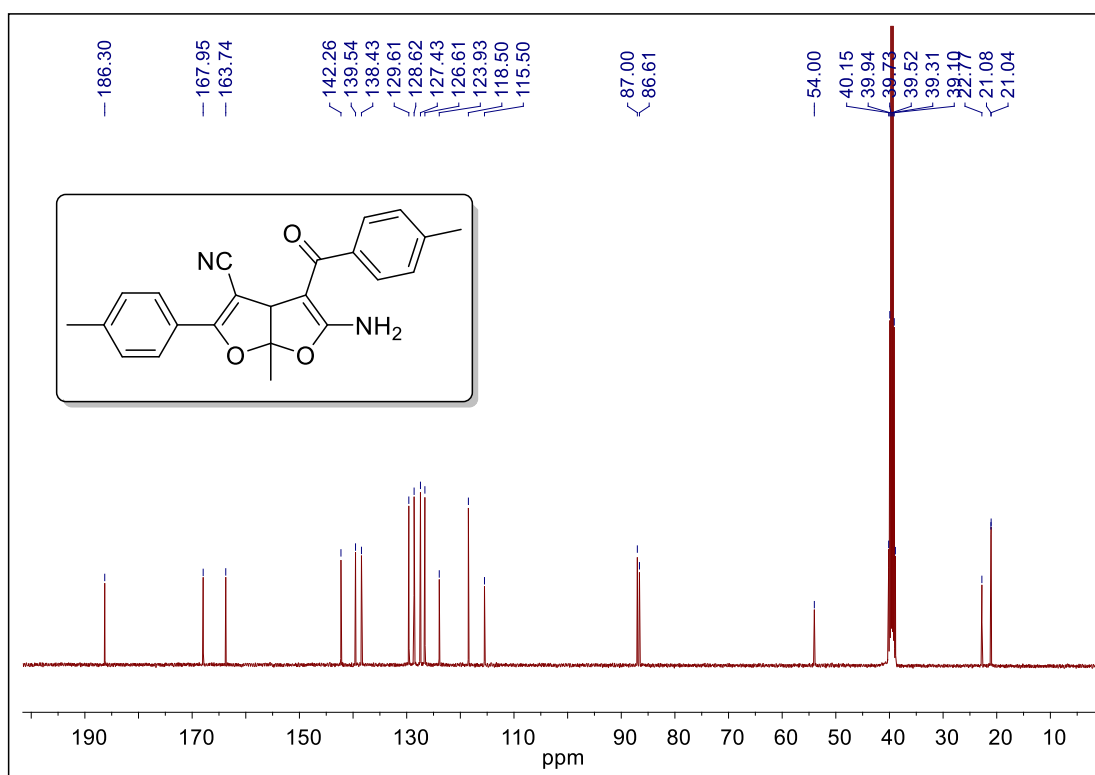

**Fig. 33** <sup>1</sup>H, <sup>13</sup>C spectrum of 5-amino-6a-methyl-4-(4-methylbenzoyl)-2-(p-tolyl)-3a,6a-dihydrofuro[2,3-b]furan-3-carbonitrile **S<sub>4i</sub>**

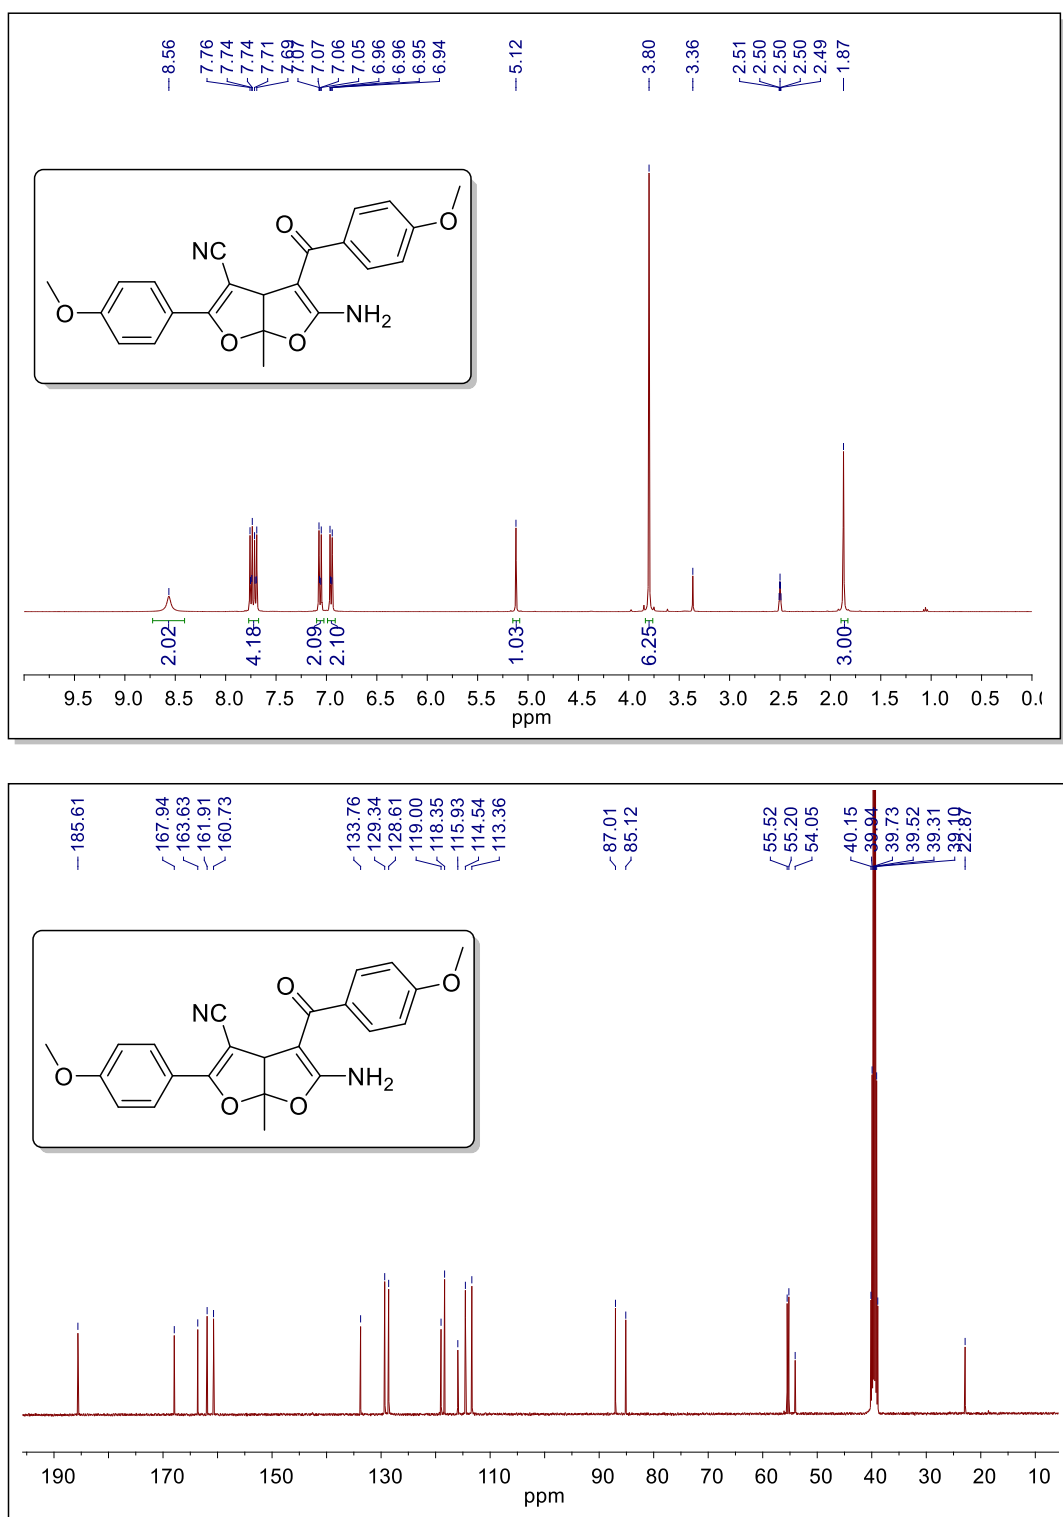

**Fig. 34** <sup>1</sup>H, <sup>13</sup>C spectrum of 5-amino-4-(4-methoxybenzoyl)-2-(4-methoxyphenyl)-6a-methyl-3a,6a-dihydrofuro[2,3-b]furan-3-carbonitrile **S<sub>4j</sub>**

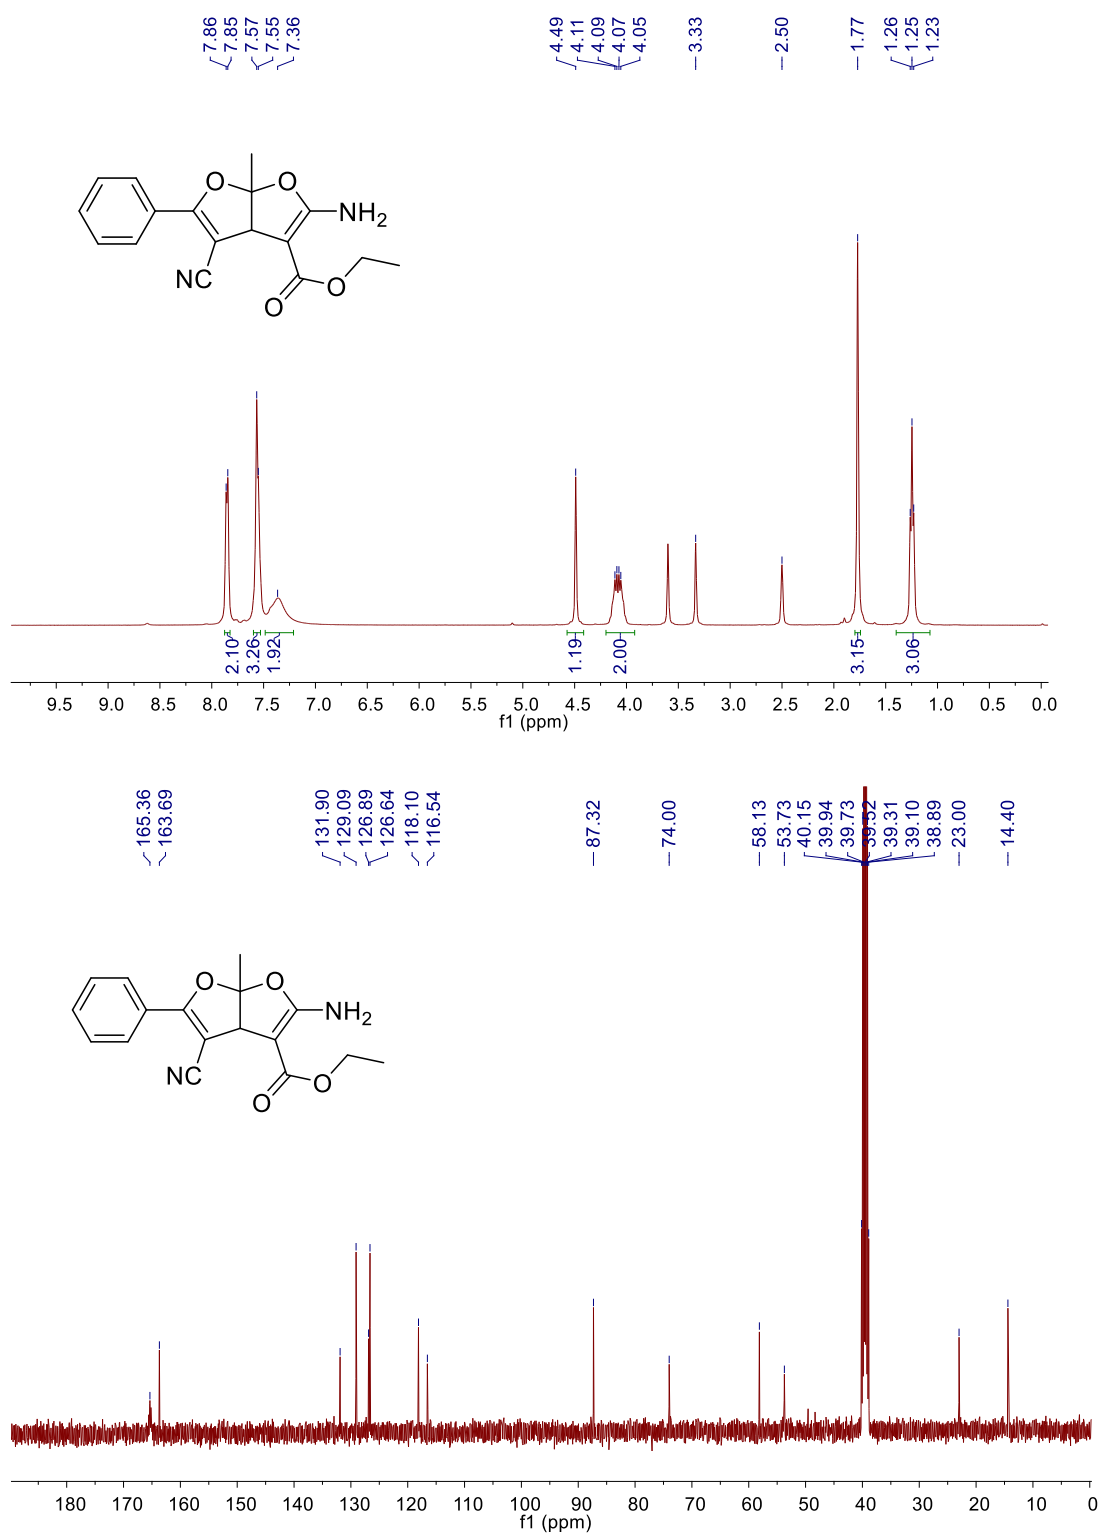

**Fig. 35** <sup>1</sup>H, <sup>13</sup>C spectrum of ethyl 2-amino-4-cyano-6a-methyl-5-phenyl-3a,6a-dihydrofuro[2,3-b]furan-3-carboxylate **S4k**

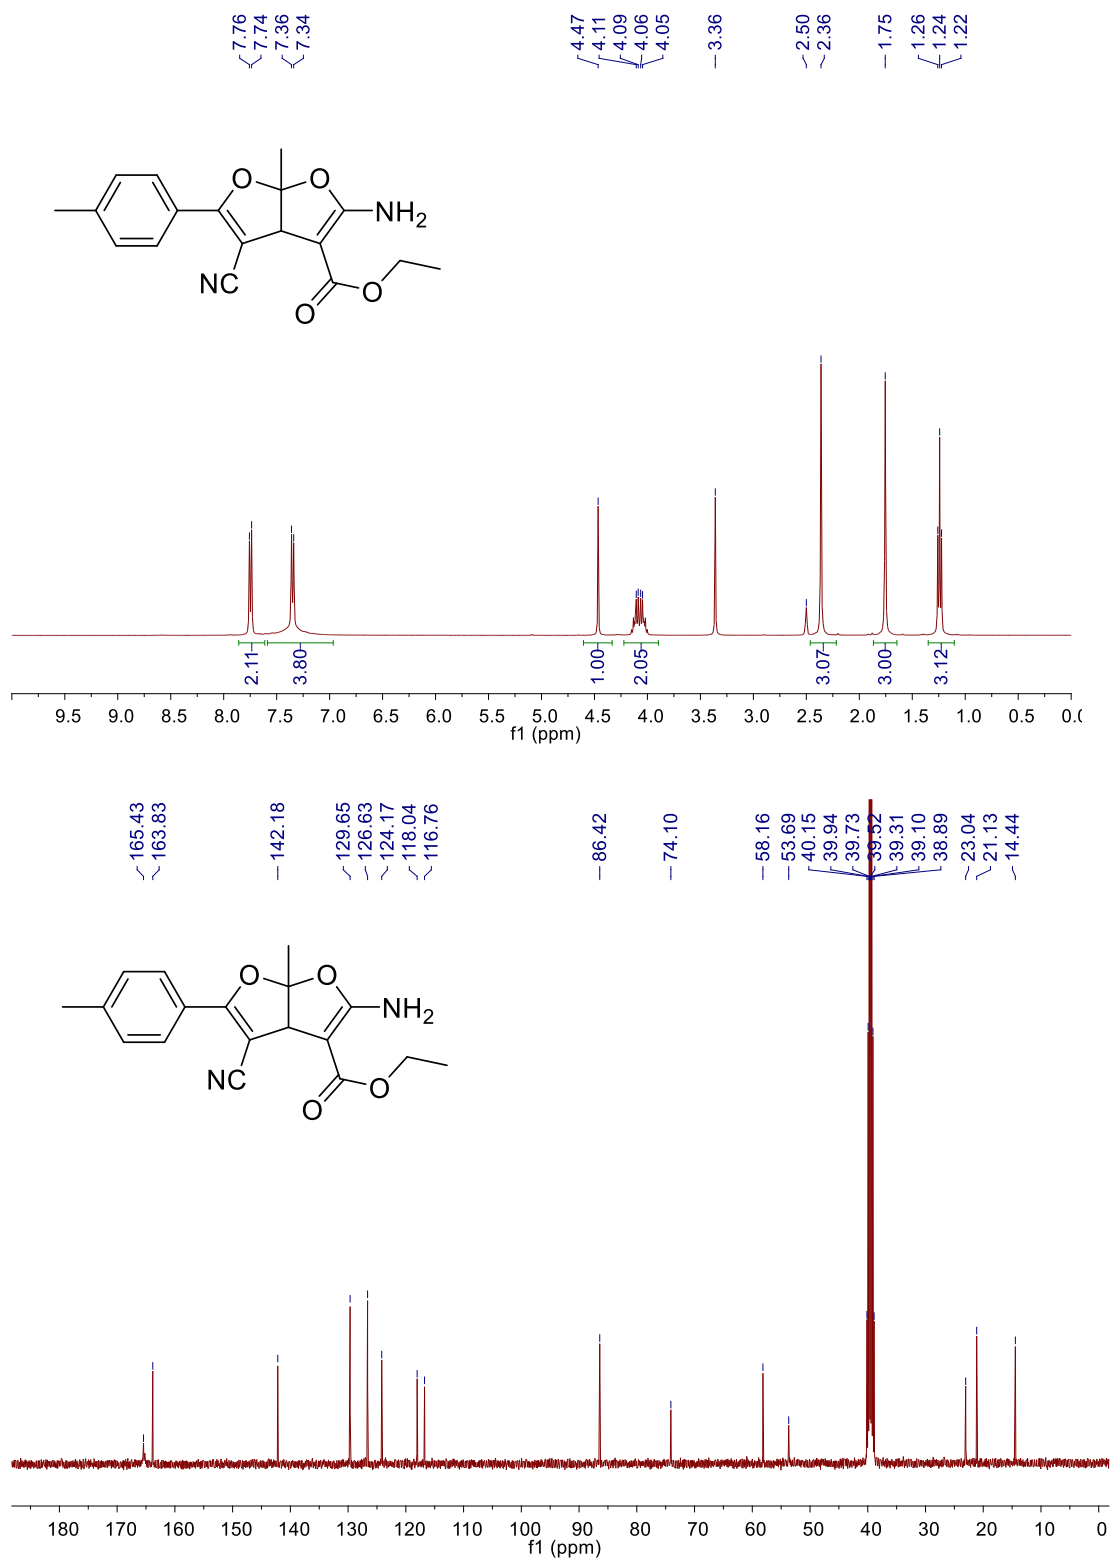

**Fig. 36** <sup>1</sup>H, <sup>13</sup>C spectrum of ethyl 2-amino-4-cyano-6a-methyl-5-(p-tolyl)-3a,6a-dihydrofuro[2,3-b]furan-3-carboxylate **S<sub>41</sub>**



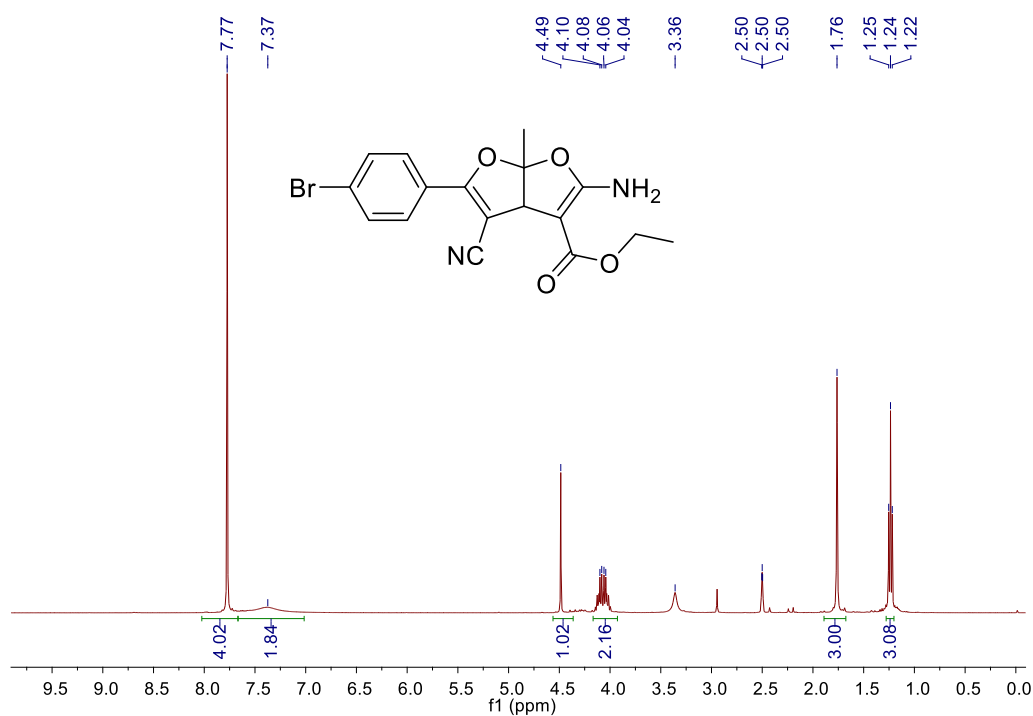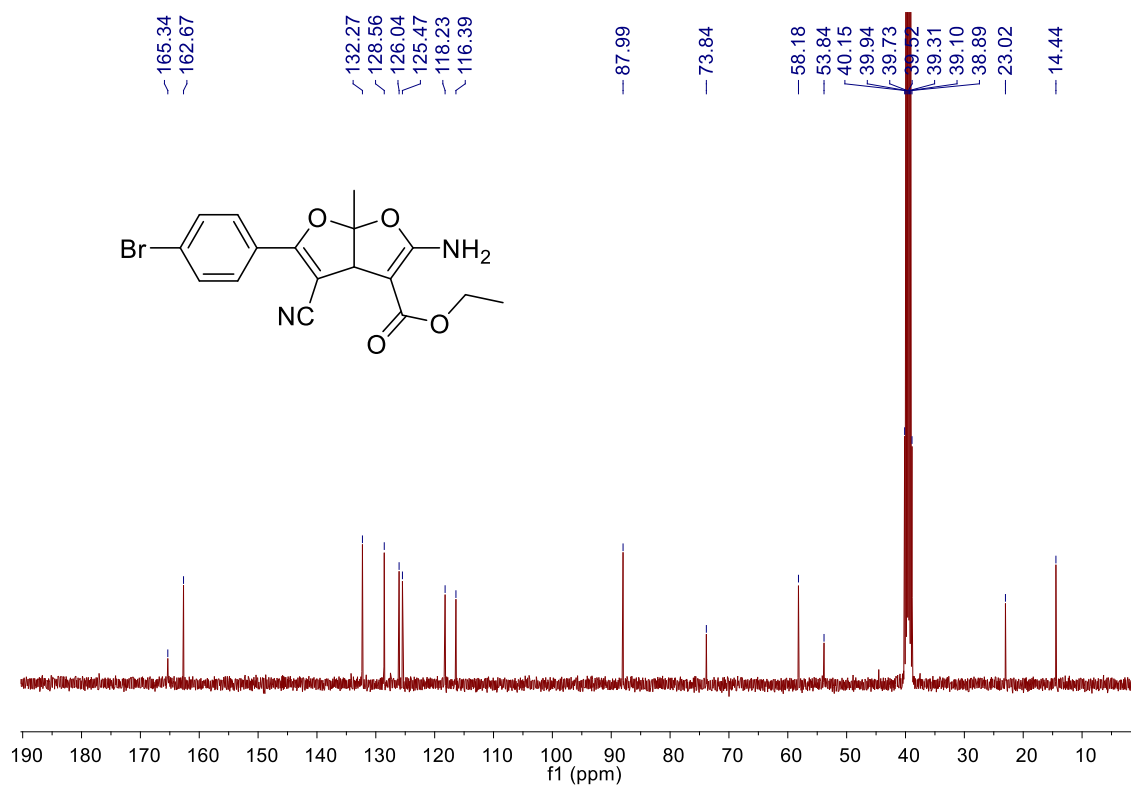

**Fig. 37** <sup>1</sup>H, <sup>13</sup>C spectrum of ethyl 2-amino-5-(4-bromophenyl)-4-cyano-6a-methyl-3a,6a-dihydrofuro[2,3-b]furan-3-carboxylate **S<sub>4m</sub>**

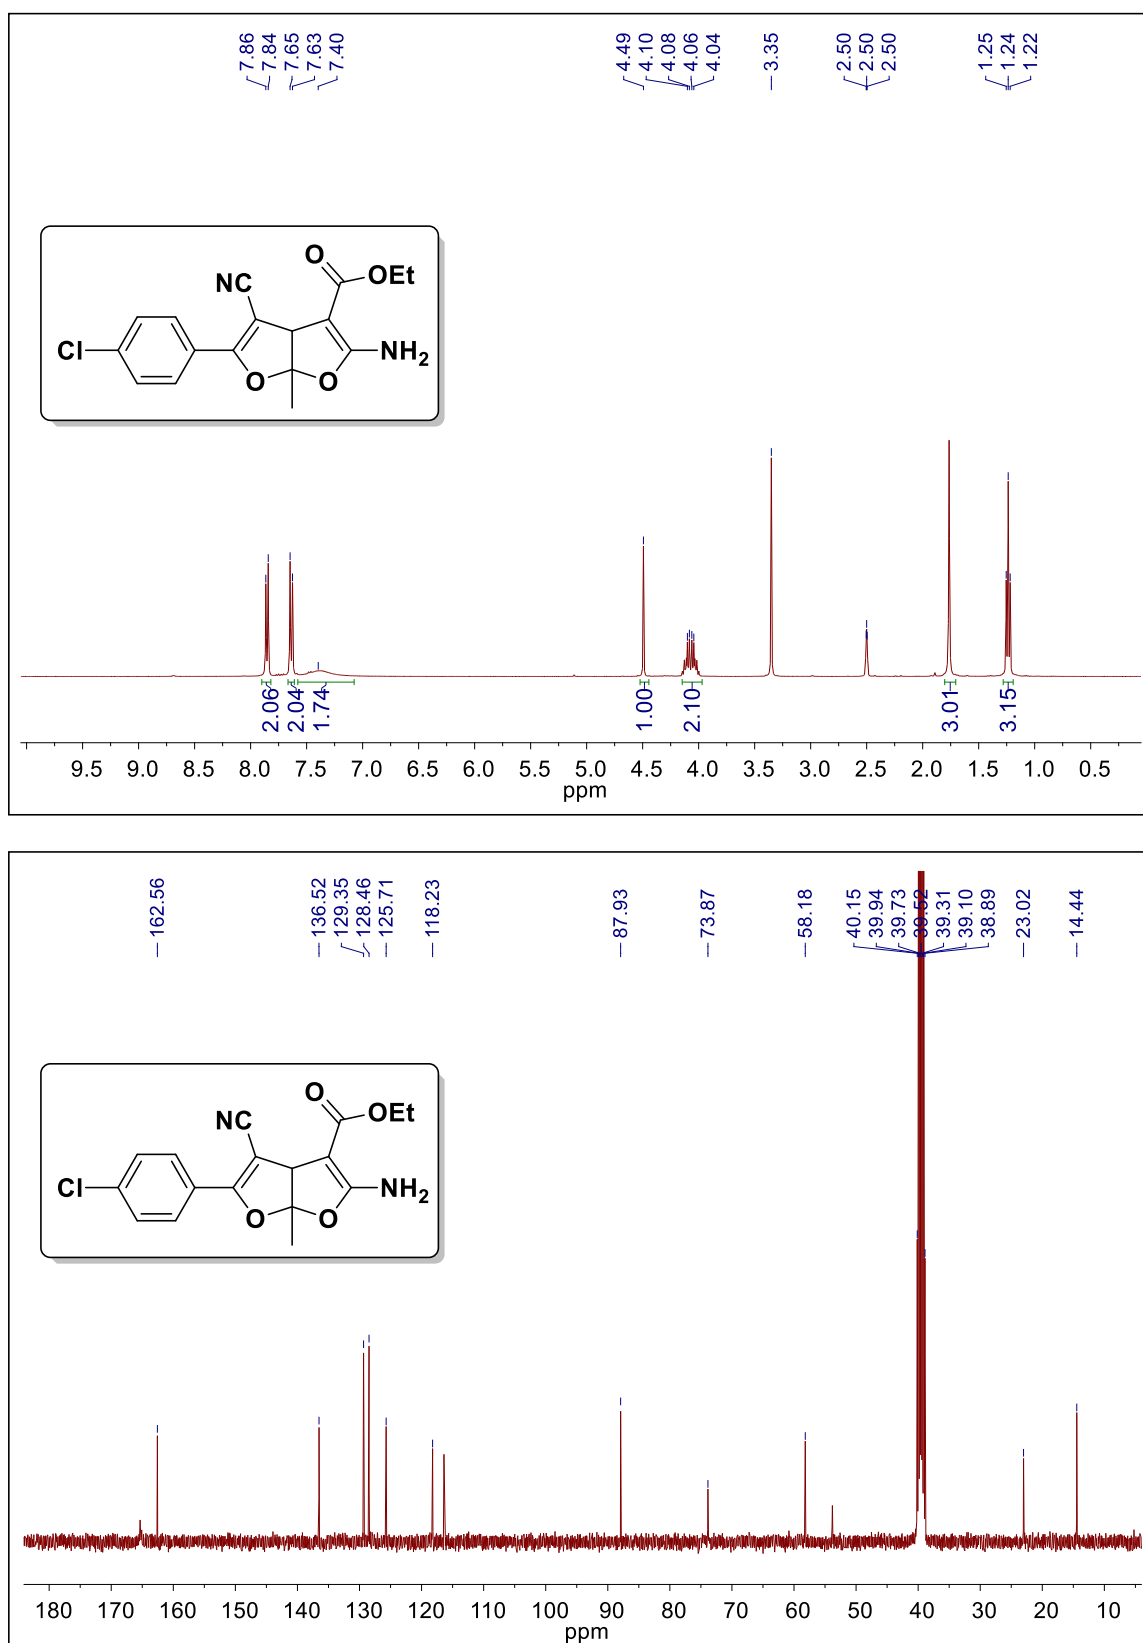

**Fig. 38** <sup>1</sup>H, <sup>13</sup>C spectrum of ethyl 2-amino-5-(4-chlorophenyl)-4-cyano-6a-methyl-3a,6a-dihydrofuro[2,3-b]furan-3-carboxylate **S<sub>4n</sub>**

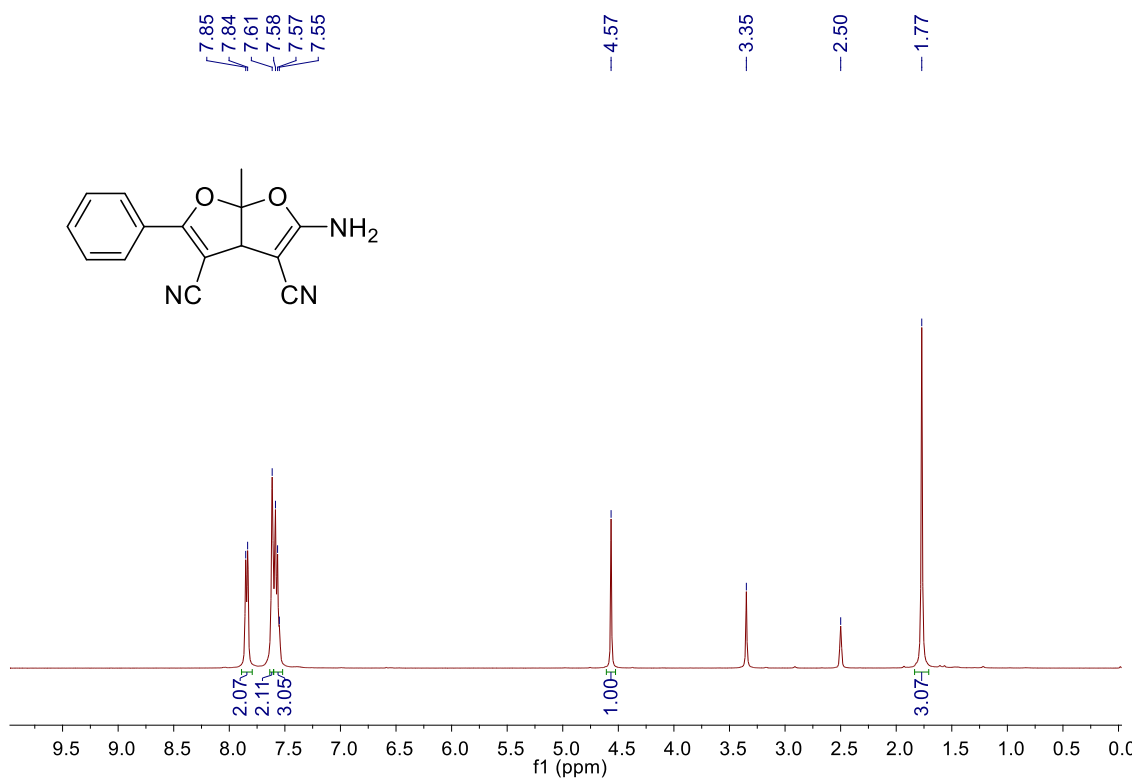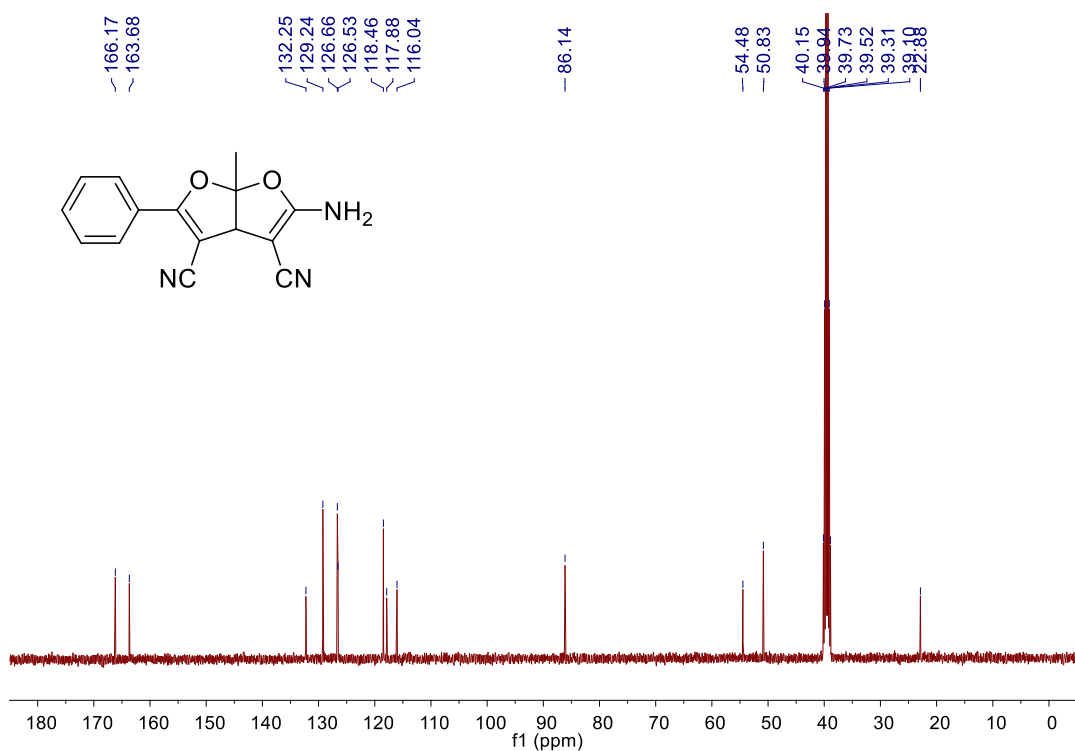

**Fig. 39** <sup>1</sup>H, <sup>13</sup>C spectrum of 2-amino-6a-methyl-5-phenyl-3a,6a-dihydrofuro[2,3-b]furan-3,4-dicarbonitrile **S**<sub>40</sub>
